Noname manuscript No.  
(will be inserted by the editor)

# 1 Predictability of intraspecific size variation in extant 2 planktonic foraminifera

3 Marina C. Rillo · C. Giles Miller · Michal Kučera ·  
4 Thomas H. G. Ezard

5  
6 Received: date / Accepted: date

7 **Abstract** Planktonic foraminifera (PF) size varies greatly both among and within species.  
8 This variation affects our understanding of PF ecology and evolution as well as reconstruc-  
9 tions of the ocean-climate system. It is currently accepted that PF species are largest under  
10 optimum environmental conditions, where abundance is maximised. This idea is based on  
11 observations from marine sediment assemblages; however, these observations either had  
12 limited intraspecific resolution or focused on a restricted part of each species' biogeograph-  
13 ical range. Here we compile a new global PF shell size dataset to investigate the relationship  
14 between intraspecific size variation and abundance and sea surface temperature (SST). Our  
15 dataset contains 3817 individual size measurements on nine PF species in 53 surface sedi-  
16 ments around the world. For each species, we fitted a generalised linear model of population  
17 shell size as function of local abundance (as an indicator of optimum environmental condi-  
18 tions) and SST. We support previous results that species maximum size and maximum  
19 abundance rank along SST; however, this relationship is not supported within species. Only  
20 two species out of nine revealed a significant positive relationship between size and abun-  
21 dance, suggesting shell size is not maximised at the species environmental optimum. SST  
22 significantly explained variation in shell size for four species out of nine. By incorporat-  
23 ing intraspecific variation and sampling broader geographical ranges compared to previous  
24 studies, we conclude that the relationships between PF shell size and abundance or SST are  
25 either absent or weaker than previously reported.

26 **Keywords** ecological optimum · relative abundance · macroecology · biogeography of  
27 traits · morphometrics · natural history collection (NHC)

---

Marina C. Rillo  
National Oceanography Centre Southampton, University of Southampton, SO14 3ZH, UK  
Department of Earth Sciences, Natural History Museum, Cromwell Road, London SW7 5BD, UK  
E-mail: marina.rillo@evobio.eu

C. Giles Miller  
Department of Earth Sciences, Natural History Museum, Cromwell Road, London SW7 5BD, UK

Michal Kučera  
MARUM, University of Bremen, Leobener Strasse, 28359, Bremen, Germany

Thomas H. G. Ezard  
National Oceanography Centre Southampton, University of Southampton, SO14 3ZH, UK

## 28 **1 Introduction**

29 Organism size is a functional trait that influences biological processes across multiple levels  
30 of organisation: from individual physiology (Brown et al., 2004) and interactions (Emmer-  
31 son and Raffaelli, 2004; Berlow et al., 2009) to populations (Damuth, 1981; Peters and  
32 Wassenberg, 1983; Jennings and Mackinson, 2003; Savage et al., 2004; Reuman et al.,  
33 2008), communities (Woodward et al., 2005; Petchey et al., 2008; Boyce et al., 2015; Gi-  
34 anuca et al., 2016) and ecosystems (Barton et al., 2013; Boyce et al., 2015). More specif-  
35 ically, size variation within species can affect species coexistence (Hart et al., 2016) and  
36 species' responses to environmental change in marine communities (Sommer et al., 2017;  
37 Mousing et al., 2017). The ecological importance of trait variation within species is promi-  
38 nent (Bolnick et al., 2011; Violle et al., 2012; Des Roches et al., 2018), suggesting that our  
39 understanding of marine ecosystems might be incomplete when examined only at the level  
40 of species.

41 Planktonic foraminifera (PF) are single-celled eukaryotes that produce calcium carbon-  
42 ate tests (or shells, Kucera 2007) and are ubiquitous in the marine pelagic environment. PF  
43 species vary remarkably in size, from diameters in the order of 1  $\mu\text{m}$  (Morard et al., 2018)  
44 up to 10<sup>4</sup>  $\mu\text{m}$  (the species *Hastigerina pelagica* can reach diameters of 2.5 cm when alive;  
45 Anderson and Be 1976). Among adults within a species, PF shell size variation can range  
46 over one order of magnitude (from 150  $\mu\text{m}$  to 1500  $\mu\text{m}$ , *Globorotalia menardii*; this study).  
47 PF shell size increases during its lifetime until reproduction (gametogenesis), after which the  
48 dead, empty shell sinks to the ocean floor (Be and Anderson, 1976; Hemleben et al., 1989).  
49 PF shells compose much of the marine sediments yielding not only a uniquely complete fos-  
50 sil record (Ezard et al., 2011) but also the most common proxy of past oceanic environments  
51 (Kucera, 2007). Therefore, quantifying and discerning what controls PF intraspecific size  
52 variation could improve not only our understanding of PF ecology and macroevolution, but  
53 also our palaeoclimate reconstructions.

54 It is currently accepted that PF species reach largest average sizes under environmental  
55 conditions to which they are optimally adapted, defined as the species' ecological optima.  
56 This idea is based on observations from marine sediments, which showed that areas of pop-  
57 ulation maximum shell size often coincide with the areas of maximum relative abundance  
58 of each species (Kennett 1976; Hecht 1976; Malmgren and Kennett 1976, 1977; Kahn 1981;  
59 Schmidt et al. 2004; Moller et al. 2013; but see Be et al. 1973). However, these studies have  
60 either focused on a single oceanic basin and thus a limited part of each species' range, or  
61 were based on small sample of taxonomically classified individuals.

62 In theory, the species' ecological optimum represents the environmental conditions where  
63 the average fitness of the population is maximised (Kirkpatrick and Barton, 1997). Optimal  
64 fitness, however, is hard to quantify, as there are trade-offs among fitness components (*e.g.*,  
65 feeding, survival, growth, reproduction; Orr 2009) and thus all cannot be maximised simul-  
66 taneously (Litchman et al., 2013). In practice, the species' ecological optimum is usually  
67 defined as the local environmental conditions where its population reaches maximum abun-  
68 dance (Kirkpatrick and Barton, 1997; Sagarin and Gaines, 2002; Liancourt et al., 2005;  
69 Wang et al., 2008; Rehfeldt et al., 2018). The underlying assumption is that higher average  
70 fitness of the population means that, on average, individuals have more energy to invest in  
71 feeding, survival, growth and reproduction and, therefore, contribute relatively more to fu-  
72 ture generations at the local optimum than elsewhere, yielding higher local abundances (Orr,  
73 2009).

74 PF local population abundance is usually estimated by counting assemblages from seafloor  
75 surface sediments. This methodology yields relative abundance data with respect to the

76 counted assemblage (*i.e.*, other co-occurring species) rather than absolute abundance, as  
77 the latter cannot be retrieved from sediment samples without precise knowledge of the local  
78 sedimentation rate. Absolute abundance could be recovered by sampling the surface wa-  
79 ters. The disadvantages of using water sampling methods to estimate species local absolute  
80 abundance is that the water samples either represent an instant snapshot of the planktonic  
81 seasonal dynamics (plankton nets) or could be subject to large interannual variability (sediment  
82 traps) (Weinkauf et al., 2016). Nevertheless, analyses of absolute abundance data from  
83 direct water sampling did not find support for a positive relationship between population  
84 shell size and abundance (Beer et al., 2010; Aldridge et al., 2012; Weinkauf et al., 2016),  
85 challenging the idea that PF intraspecific size variation can be predicted by population abun-  
86 dances.

87 Alternatively, PF size variation could be predicted by physical and chemical properties  
88 of the seawater. Abiotic factors such as temperature, salinity, nutrient availability, carbonate  
89 saturation and oxygen availability are known experimentally to influence PF final shell size  
90 (Be et al., 1981; Caron et al., 1981, 1987b,a; Hemleben et al., 1987; Bijma et al., 1990b,  
91 1992). In the open ocean, most of these environmental variables are highly correlated and  
92 difficult to disentangle (Schmidt et al., 2006; Aldridge et al., 2012; Fenton et al., 2016). Sea  
93 surface temperature (SST) appears to be the most important abiotic parameter affecting PF  
94 assemblage size structure (Schmidt et al., 2004) and, more generally, PF spatial diversity  
95 patterns (Rutherford et al., 1999; Morey et al., 2005; Tittensor et al., 2010; Fenton et al.,  
96 2016). Thus, if PF shell size responds to optimum SST in a predictable way, we can expect  
97 shell size to (*i*) decrease with increasing SST for polar species, (*ii*) reach largest values  
98 at intermediate SST for transitional species, or (*iii*) increase with increasing temperature  
99 for tropical species (Schmidt et al., 2006). Moreover, the SST at which PF species reach  
100 largest size and highest relative abundance have been shown to coincide (Schmidt et al.,  
101 2004), supporting the idea that PF reach largest shell size at the species ecological optimum  
102 (Hecht, 1976).

103 Here we explore for the first time in a global biogeographical scale how population-  
104 level PF size relates to local relative abundance and SST. We built a new intraspecific shell  
105 size dataset for nine extant PF species, extracted from a recently digitised museum collection  
106 (Rillo et al., 2016). Our data comes from seafloor sediments, which averages short-term fluc-  
107 tuations in abundance that potentially blur macroecological patterns (Fenton et al., 2016).  
108 We spatially associate our morphometric data with population-level relative abundance data  
109 and local SST data to test: (*i*) whether PF populations are largest where they are most abun-  
110 dant, (*ii*) what is the relationship between SST and PF within-species size variation and (*iii*)  
111 if the SST values at which a species reaches maximum size and maximum relative abun-  
112 dance coincide (as found by Schmidt et al. 2004).

## 113 2 Material and Methods

114 Our PF size dataset was extracted from the recently digitised Henry Buckley Collection  
115 of Planktonic Foraminifera (Rillo et al., 2016), held at The Natural History Museum in  
116 London (NHMUK). We measured shell area of 3817 individuals from the nine extant PF  
117 species most commonly represented in the collection across 53 sites worldwide (Fig. 1). We  
118 obtained corresponding open-access data on the relative abundance of each species (Siccha  
119 and Kucera, 2017) and mean annual values of SST (Locarnini et al., 2013) for each sampled  
120 site.

## 121 2.1 Study sites and samples

122 Henry Buckley sampled 122 marine sediments from the NHMUK Ocean-Bottom Deposits  
123 Collection (OBD) to amass the NHMUK Henry Buckley Collection of Planktonic Foraminifera  
124 (Rillo et al., 2016). From these sea-floor sediment samples, we selected those that contained  
125 only modern species (Table S2), were collected within the upper 15 cm of sediment, and  
126 included at least one of the nine focal species (see below). This resulted in 53 study sites  
127 covering the major physical and chemical gradients of the world's oceans (Fig. 1a). Our  
128 sample sites are predominantly in the Pacific and Indian oceans, as opposed to the study of  
129 Schmidt et al. (2004), which had more samples in the Atlantic ocean. The 53 sediment sam-  
130 ples used in our study were collected by historical marine expeditions between the years of  
131 1873 and 1965 (Table S1), and have been shown to be representative of the Holocene (Rillo  
132 et al., 2018).

133 We determined the water depth for each site by matching the collection's reported lat-  
134 itudes and longitudes to the ETOPO1 database hosted at the National Oceanic and Atmo-  
135 spheric Administration website (Amante and Eakins, 2009) using a 2 arc-minute grid resolu-  
136 tion (R package *marmap* version 0.9.5, Pante and Simon-Bouhet 2013). Water depth ranged  
137 from 746 to 5153 meters below sea level (median 3296 m).

## 138 2.2 Shell size data

139 We measured shell area of the nine most abundant PF species in the NHMUK Henry Buckley  
140 Collection of Planktonic Foraminifera, all having at least 244 specimens in the collection,  
141 resulting in 3817 individual measurements (Table 1, S1). Brombacher et al. (2018) recently  
142 showed that PF shell area provides a consistent proxy for shell volume, and thus a more  
143 realistic estimation of organism size. The species *Globigerinoides ruber* (white), *G. ruber*  
144 (pink) and *G. elongatus* (Aurahs et al., 2011) were analysed together as *G. ruber*.

145 The specimens of the collection were imaged using a Zeiss Axio Zoom V16 microscope  
146 and ZEN software at a resolution of 2.58  $\mu\text{m}$  x 2.58  $\mu\text{m}$  per pixel. Individual size was  
147 estimated based on the two-dimensional image of the specimen using the software Image-  
148 Pro Premier (version 9.1), which automatically recognises each specimen and measures its  
149 shell area. This automated individual recognition is based on the contrast between the white  
150 shell and the black background of the slide. However, there was differential fading through  
151 the years of slide backgrounds of the Buckley Collection, which impeded the use of the same  
152 automated contrast threshold. Thus, the contrast threshold was inspected for each image and,  
153 when necessary, altered in order to precisely measure the shell contour of the specimen.

154 Henry Buckley mounted most specimens on the slides in a standard orientation (Fig.  
155 1b, Table 1); individuals that had a different orientation or dubious taxonomic identification  
156 were excluded from the analysis. The Buckley Collection could have a collector effort bias  
157 towards larger (or smaller) specimens. To assess this potential bias, we re-sampled ten ori-  
158 ginal bulk sediments from the OBD Collection that Buckley had used to amass his collection  
159 (Fig. 1a, Section S3). We mounted species-specific slides from the re-sampled samples and  
160 extracted shell size data in the same way as for the slides of the Buckley Collection. The  
161 comparison of the shell size distributions between the re-sampled and Buckley's samples  
162 included 2873 individuals (1824 from the re-sampled samples and 1049 from the Buckley  
163 Collection) from 20 species collected from the ten sites, 65 populations in total (Section S3).  
164 We log-transformed the shell data and calculated the mean, median, 75th percentile, 95th  
165 percentile and maximum value of each population shell size distribution. We then regressed

166 each of these five population metrics of the Buckley Collection against the re-sampled data,  
167 and calculated the residuals based on the identity function (1:1 relationship). The residu-  
168 als of the regressions were predominantly positive (Fig. S2), indicating that the Buckley  
169 Collection has a consistent collector bias towards large specimens.

170 The mean squared error was lowest for the 95th percentile (Fig. S2), meaning that this  
171 metric is the most representative population metric of the Buckley Collection. The robust-  
172 ness of the size distribution's 95th percentile has also been documented by Schmidt et al.  
173 (2004), as it is less sensitive to single outliers than the distribution's maximum value, and  
174 to representative sampling at the lower end of the size range than the distribution's mean  
175 and median values. Accordingly, in our analyses, we used the 95th percentiles of the pop-  
176 ulation shell size distributions as the dependent variable to investigate what controls PF  
177 intraspecific shell size variation. As Henry Buckley personally carried out all the sample  
178 processing, isolation of foraminiferal specimens and their identification, the collector biases  
179 in his collection are likely to be systematic for within-species comparisons.

### 180 2.3 Relative abundance data

181 To test the relationship between population shell size and abundance, we extracted assem-  
182 blage composition data from the ForCenS open database (Siccha and Kucera, 2017). This  
183 database is a synthesis of PF assemblage counts from surface sediment samples, with 4205  
184 records from unique sites worldwide, each with corresponding information on species rela-  
185 tive abundance. We assume that relative abundances of species match their absolute abun-  
186 dances. This assumption is supported by studies of Beer et al. (2010) and Weinkauff et al.  
187 (2016), who found consistency between analyses using both relative and absolute popula-  
188 tion abundances. Moreover, long-term sediment traps, which would average out inter-annual  
189 variability and thus be ideal for absolute abundance estimation, are not available on the geo-  
190 graphic resolution of our morphometric dataset especially in the Pacific Ocean (see Jonkers  
191 and Kucera 2015).

192 The spatial arrangement of dead PF on the sea floor is affected during settling by sub-  
193 surface currents (Berger and Piper, 1972). Recent models estimate that dead foraminiferal  
194 shells can travel a maximum distance of 300 km in regions with largest horizontal velocities  
195 along the equator, in the western boundary currents and in the Southern Ocean (Van Sebille  
196 et al., 2015). To account for this post-mortem spatial variation of foraminiferal abundance  
197 on the sea floor, we retrieved ForCenS assemblage data within a 300 km radius distance of  
198 each morphometric sample coordinate. We then calculated the median relative abundance  
199 for each species based on all ForCenS samples that fell within the 300 km distance of each  
200 morphometric sample. The distances between the datasets were calculated considering the  
201 World Geodetic System of 1984 (WGS 84) (R package *geosphere* version 1.5-7, Hijmans  
202 2015).

203 To test for the effect of retrieving relative abundance data of samples 300 km apart,  
204 we ran the same analysis using solely the nearest neighbour of the ForCenS database rela-  
205 tive to each morphometric sample. The median distance between the morphometric samples  
206 and their nearest ForCenS neighbours was 106 km. The analyses using the single nearest  
207 ForCenS sample produced consistent results when compared to the analyses using all sam-  
208 ples within a 300 km distance (Section S5). We present results using the more conservative  
209 300 km median relative abundance.

## 210 2.4 Sea surface temperature data

211 We compiled mean annual values of sea surface temperature from the World Ocean Atlas  
212 2013 (WOA13, 0 meters depth, Locarnini et al. 2013) for each morphometric sample by  
213 matching its unique latitude and longitude coordinates to the nearest WOA13 1° grid point  
214 (1° is approximately 111 km at the equator). Again, the distances between the datasets were  
215 calculated using the WGS 84 system (Hijmans, 2015). We used SST data from the earliest  
216 decade available in the WOA13 database, resulting in SST data averaged for the years be-  
217 tween 1955 and 1964. We chose this time period because the last historical expedition that  
218 we used for our morphometric dataset sailed in 1965 (Table S1).

## 219 2.5 Statistical analysis

220 Effects of relative abundance and sea surface temperature on PF population shell size dis-  
221 tributions were assessed using generalised linear models (GLM) with the Gamma error dis-  
222 tribution to correct the shell area distributions. The logarithmic link function was used for  
223 consistency with our later analyses. For each species, the dependent response variable was  
224 the 95th percentile of the population size distribution whereas the independent explanatory  
225 variables were the local relative abundances (median within 300 km distance) and mean  
226 annual SST. We compared the GLM models through a hierarchical model selection frame-  
227 work. We started all analyses with a null model that included the population shell size as the  
228 dependent variable and the regression parameter constant (sample mean). We then added the  
229 predictor variable(s) to this model incrementally to see whether the model was improved.  
230 Adjusted R-squared ( $R^2_{adj}$ ) were calculated for each GLM model (R package *rsq* version  
231 1.0.1, Zhang 2017). Model fit was assessed using Akaike information criterion corrected for  
232 small sample size (AICc, R package *MuMIn* version 1.40.0, Barton 2017).

233 We also investigated the general relationship between PF shell size and relative abun-  
234 dance and SST using linear mixed-effects regression (LMER) (R package *lme4* version  
235 1.1.15, Bates et al. 2015). The log-transformed 95th percentile of the population shell size  
236 distributions was modelled as the response variable, and the independent fixed variables (ef-  
237 fects) were the local relative abundances (median within 300 km distance) and the mean  
238 annual SST. We log-transformed the shell size variable and used a normal error distribu-  
239 tion because a generalised linear mixed-model (GLMM) would not converge for our data.  
240 Species were modelled as random effects, allowing for random intercepts and slopes (*i.e.*,  
241 the intercept and slope of the relationship between shell size and the fixed effects may vary  
242 among species). We used the Likelihood Ratio Test (LRT) to compare the likelihood of each  
243 fixed effect (including interactions between effects). For each possible added fixed effect,  
244 we calculated the LRT between the models with and without the effect. Significance of each  
245 fixed effect was given through the LRT. Marginal  $R^2$  ( $R^2_m$ ), which refers to the fixed effects,  
246 was calculated for each LMER.

## 247 3 Results

248 In general, intraspecific size variation is high among populations (Fig. 2) and within popu-  
249 lations (Fig. S3). Among the nine PF species studied, only *T. sacculifer* and *G. truncatuli-*  
250 *noides* show a statistically significant positive relationship between shell size and relative



251 abundance. Relative abundance never explains more than 7% of population shell size variation  
252 ( $R_{adj}^2$  in Fig. 2a). Regarding mean annual SST, *T. sacculifer*, *G. siphonifera* and *P.*  
253 *obliquiloculata* increase in size significantly with linear increase of SST (Fig. 2b) while *G.*  
254 *truncatulinoides* intraspecific shell size variation is significantly explained by a quadratic  
255 function of SST. Shell size in the other five species did not covary significantly with SST.

256 No GLM with relative abundance as the sole explanatory variable was the best-supported  
257 model (Table 2). Although relative abundance alone significantly explains shell size varia-  
258 tion within *T. sacculifer* and *G. truncatulinoides* (Fig. 2a), the best supported model for *T.*  
259 *sacculifer* and *G. truncatulinoides* includes only SST, and adding abundance data has no  
260 impact or decreases the amount of intraspecific size variation explained by the SST model  
261 ( $R_{adj}^2$  in Table 2). *G. menardii*'s best supported model was the full GLM of both variables  
262 (abundance and quadratic SST) plus their interaction term (Table 2), with  $\Delta AICc > 2$  and  
263 high model weight (Table 2). *G. ruber* and *G. conglobatus* show equal or similar weights  
264 between the null and the relative abundance models; however, relative abundance does not  
265 significantly explain shell size variation in these two species when tested alone (Fig. 2a). In  
266 *N. dutertrei* and *G. inflata*, intraspecific variation was best explained by the null (intercept-  
267 only) model with  $R_{adj}^2$  below 3% (Table 2). Visual inspection of the residual plots did not  
268 reveal any obvious deviations from homoscedasticity, except for *G. inflata* (Fig. S4i).

269 The LMER shows that relative abundance and linear SST are both significant fixed ef-  
270 fects explaining PF population shell size variation (Table 3). The deviance of the data to  
271 the models with only SST or abundance is almost equal (both around 112), but by adding  
272 both explanatory variables the deviance decreases (to 104), showing that there is an additive  
273 effect of SST and abundance (Table 3). The interaction between SST and abundance is not  
274 significant.

275 We used the observations in the 53 samples to determine the SST at which each species  
276 reaches its largest size (95th percentile of the population) and the SST at which each species  
277 is most abundant. We expected to see a positive species-level relationship as found by  
278 Schmidt et al. (2004). Although our data shows a positive trend (Fig. 3), the linear rela-  
279 tionship is not significant (linear regression,  $R_{adj}^2 = 0.11$ ,  $P = 0.198$ ) with lower  $R_{adj}^2$  value  
280 compared to the value of 0.98 found in Schmidt (2002). We also find a markedly higher  
281 mean squared error (MSE = 19.07) with respect to the identity function when compared to  
282 the MSE of 1.34 of the Schmidt (2002) data (Fig. 3).

283 Lastly, we also used all our 53 observations to get the values of median population shell  
284 size and median relative abundance for each species. When these two variables are plotted  
285 against each other, they show a negative relationship (Fig. 4), indicating that the species that  
286 reach average larger sizes are generally less abundant (relatively) than smaller species.

## 287 4 Discussion

288 Our new global dataset of planktonic foraminifera shell size allowed us to explore the pre-  
289 dictability of PF intraspecific size variation. Contrary to the common perception that PF  
290 species are largest where they are most common (Hecht, 1976; Schmidt et al., 2004), the  
291 relative abundance of a species was in general a poor predictor of its size variation: only two  
292 (*T. sacculifer* and *G. truncatulinoides*) of the nine species analysed (Fig. 2a) exhibited a sta-  
293 tistically significant relationship between size and abundance. Moreover, adjusted R squared  
294 values were low for all species (maximum reached: 0.07) and the relative abundance model  
295 was not the best supported model for most of the species analysed (Table 2).

296 Sea surface temperature explained more PF shell size variation than relative abundance  
297 (Fig. 2b, Table 2). *T. sacculifer*, *G. siphonifera* and *P. obliquiloculata*, which are tropical-  
298 subtropical species (Kucera, 2007), showed a positive linear relationship between SST and  
299 shell size. Moreover, the transitional *G. truncatulinooides* showed a quadratic relationship  
300 between shell size and SST (Table 2). These results support the idea that PF species are  
301 largest at their environmental temperature optimum (Hecht, 1976; Schmidt et al., 2004,  
302 2006). However, the other analysed species (namely *G. ruber*, *G. conglobatus*, *G. menardii*,  
303 *N. dutertrei* and *G. inflata*) showed neither a linear nor quadratic relationship between shell  
304 size and SST (Fig. 2b, Table 2), contrary to the expectation of the ecological optimum hy-  
305 pothesis. The definition of optimal temperature range for a species is based on their relative  
306 abundances in the marine sediments, with higher relative abundances indicating more opti-  
307 mal temperatures (Kucera, 2007). Thus, although SST could explain more intraspecific shell  
308 size variation than local abundance, a positive monotonic relationship between shell size and  
309 relative abundance of a species would still be expected under the ecological optimum hy-  
310 pothesis, regardless of the species' biogeography.

311 When increasing model power by analysing all the species together under a LMER  
312 framework, relative abundance is a significant explanatory variable of PF intraspecific shell  
313 size variation (Table 3). A linear positive relationship between shell size and SST is also  
314 significant (Table 3), even though the LMER includes species with multiple biogeographical  
315 preferences (Kucera, 2007). This observation, alongside the contrast between the results  
316 from LMER models and the overall GLM models, suggest that the significance of the LMER  
317 models are being leveraged by few species' size variation patterns because of the small  
318 number of random effects (*i.e.*, species).

#### 319 4.1 Potential biases in the museum collection

320 It might be that we did not find a strong relationship between size and abundance within  
321 species because of the collector biases found in the NHMUK Henry Buckley Collection of  
322 Planktonic Foraminifera (Fig. S2). Another concern regarding our analyses is that we used  
323 relative abundance data from the ForCenS database (Siccha and Kucera, 2017) instead of the  
324 abundance data estimated from the sediment samples used in the shell size data. As a result,  
325 sometimes the ForCenS database yielded 0% of relative abundance of a species in the same  
326 region that we had size data for the given species (Fig. 2a). Considering these two issues, we  
327 assessed the robustness of our results by testing the same hypothesis on a more uniform, but  
328 smaller, dataset. We re-sampled ten original sediment samples used by Buckley to amass  
329 his collection (same samples used in the shell size bias analysis, Fig. 1a). We identified,  
330 counted and measured the size of all PF individuals in each of the ten samples (Section  
331 S3), minimising therefore any potential collector bias. Relative abundances of species were  
332 calculated from each re-sampled assemblage itself, meaning that the same specimens were  
333 used to extract abundance and size data. We then tested if population shell size could be  
334 predicted by relative abundance in this re-sampled dataset using a linear-mixed effect model  
335 with species as random effects. The re-sampled dataset included 20 species, summing 65  
336 populations from the ten sites. The results showed no significant relationship between size  
337 variation and relative abundance (Chi-square test,  $\chi^2 = 2.18$ ,  $P = 0.14$ , Table S4), supporting  
338 our previous findings using the global Buckley Collection data and our statistical models.

339 Another source of bias in the Buckley Collection is that the samples come from different  
340 expeditions using different sediment sampling strategies (Table S1). This source of bias is  
341 inherent to this historical collection, as it includes samples from pioneering marine expedi-



342 tions such as the *HMS Challenger* (1872–76) which lay on the foundation of oceanography  
343 and ocean-floor sampling. In a previous study (Rillo et al., 2018), we showed that the PF  
344 assemblages estimated from these historical samples are representative of Holocene assem-  
345 blages and can, therefore, be used in macroecological studies.

346 Ten of the 53 samples in our dataset come from sediments prone to dissolution (*i.e.*,  
347 waters deeper than 4000 meters for newly sedimented foraminifera, Berger and Piper 1972).  
348 Dissolution may affect species size distributions, as smaller individuals are more prone to  
349 dissolution (Kennett, 1976; Be and Hutson, 1977). We tested if water depth could explain  
350 population shell size variation using a linear-mixed effects model with species as random  
351 effects and found that water depth is not significantly related to PF size variation in our  
352 dataset (Chi-square test,  $\chi^2 = 1.83$ ,  $P = 0.18$ , Table S5).

#### 353 4.2 Cryptic species

354 It is possible that some species in our morphological dataset are in fact complexes of lin-  
355 eages, which are genetically independent but morphologically similar (De Vargas et al.,  
356 1997; Darling and Wade, 2008). These "cryptic species" may have different geographical  
357 distributions (De Vargas et al., 1999), occupy different niches (Darling and Wade, 2008)  
358 and/or display different relationships between size and abundance and SST. It has been  
359 shown that many of these cryptic species are endemic to particular ocean basins (Darling  
360 and Wade 2008; De Vargas et al. 1999; and references below), so increasing the geographi-  
361 cal range of the sampling would also increase the coverage of the cryptic diversity within  
362 our morphologically-defined species. Among the nine tested species, *T. sacculifer* and *G.*  
363 *conglobatus* are genetically homogeneous (Aurahs et al., 2011; Seears et al., 2012; Andre  
364 et al., 2013). The size-abundance-SST relationship in these species is not markedly different  
365 from the species with cryptic diversity, namely *G. inflata* (Morard et al., 2011), *G. ruber*  
366 (Aurahs et al., 2011), *G. siphonifera* (Seears et al., 2012; Weiner et al., 2014), *G. truncat-*  
367 *ulinoides* (Quillevère et al., 2013) and *P. obliquiloculata* (Ujiie et al., 2012). Therefore, the  
368 lack of relationship between size and relative abundance and SST does not seem to be ex-  
369 plained by the presence of cryptic species. Schmidt et al. (2004) suggested that peaks in  
370 maximum population shell size at distinct SST could relate to the species' cryptic phylo-  
371 geography. However, the high variability in shell size among and within populations found  
372 in our study obscured any potential multimodal shell size distributions across the SST range  
373 (Fig. 2, Fig. S3).

#### 374 4.3 Species vs. population-level patterns

375 The idea that species are largest at their ecological optima is recently based on the compari-  
376 son of temperatures where a species reaches maximum sizes and the temperatures where it  
377 reaches maximum relative abundance (see Schmidt et al. 2004). Our species-level compar-  
378 ison showed a positive but not significant relationship between SST of maximum size and  
379 abundance (Fig. 3). Although the non-significance of our regression is probably partially due  
380 to the absence of sub polar and polar species in our dataset (*e.g.* *G. bulloides*, *N. incompta*  
381 and *N. pachyderma*), our mean squared error with respect to the identity line was strikingly  
382 larger than the one of the Schmidt (2002) (Fig. 3). Moreover, species close to the identity  
383 line in Fig. 3 do not show a significant relationship of size and abundance at the population-  
384 level (Fig. 2a). This result shows that contrasting patterns may be found when analysing

385 different organizational levels, and emphasizes the importance of intraspecific variation. In-  
386 deed, recent evidence has been accumulating showing that variation within species is crucial  
387 for our understanding of macroecological and evolutionary patterns (Bolnick et al., 2011;  
388 Violle et al., 2012; Hart et al., 2016) and sometimes even surpasses the community-level  
389 effects related to variation among species (Mousing et al., 2017; Des Roches et al., 2018).

390 Another way of looking at species-level patterns is to plot the median population shell  
391 size against median relative abundance. PF species showed a negative relationship between  
392 size and relative abundance (Fig. 4). Abundant species such as *G. ruber* and *G. inflata* reach  
393 smaller average sizes when compared to less abundant species such as *G. conglobatus* and  
394 *G. truncatulinoides*. The trade-off between size and abundance is a known macroecological  
395 pattern (Damuth, 1981; Woodward et al., 2005; White et al., 2007; Yvon-Durocher et al.,  
396 2011; Villarino et al., 2018). Larger organisms have higher nutrient requirements and thus,  
397 for a given amount of resources, have slower growth rates and obtain lower population den-  
398 sities than smaller organisms (Fenchel, 1974; Muller and Geller, 1993; Savage et al., 2004;  
399 Huete-Ortega et al., 2012). It remains to be tested whether smaller PF species have indeed  
400 faster population growth rates.

401 At population-level, the mechanism that would lead to simultaneous increase of cell size  
402 and population abundance (characterising the species ecological optimum) could involve  
403 higher resource availability leading to higher individual growth and, consequently, higher  
404 populational growth (Schmidt et al., 2004). Experiments have shown that a higher feeding  
405 frequency (*i.e.*, higher resource availability) leads to faster cell growth and larger final cell  
406 size, but it also leads to an earlier onset of gametogenesis (Be et al., 1981). Thus, if resources  
407 are plentiful, then the Be et al. (1981) experiments suggests that individuals should be larger  
408 but also mature earlier, which results in shorter generation times and higher local abundance  
409 in the sediment (given PF life cycle, Hemleben et al. 1989). This mechanism could explain  
410 the expected ecological optimum pattern of large sizes and high abundances. However, it  
411 implies that populations in different environments have different generation times, which  
412 contradicts the evidence that PF reproduction is synchronised with the lunar periodicity (Bi-  
413 jma et al., 1990a; Jonkers et al., 2015). Moreover, more generations per year at the optimum  
414 would result in higher abundance in the sediment, but relative to other populations of the  
415 same species, and not relative to the local assemblage (as the usual PF relative abundance  
416 data). In the local assemblage, resource availability is the same for all co-occurring species.  
417 As smaller species are generally more abundant in the sediment (Fig. 4), relative abundance  
418 data regarding the local assemblage potentially blur within-species ecological patterns.

## 419 5 Conclusion

420 Our results caution against using the relative abundance of a species or SST to predict plank-  
421 tonic foraminifera intraspecific shell size variation. Regarding the understanding of PF ecol-  
422 ogy and evolution, maximum shell size might not indicate that a species is at its ecological  
423 optimum, and/or the highest relative abundance of a species in the sediment might not co-  
424 incide with its ecological optimum. The low predictability of PF intraspecific size variation  
425 found in our study also has implications for PF biomass estimation. If shell size is pre-  
426 dictable, then more studies are needed to understand what drives the vast majority of the  
427 PF within-species size variation. Finally, our results highlight the utility of natural history  
428 collections and the importance of studying intraspecific variation when interpreting macroe-  
429 cological patterns.

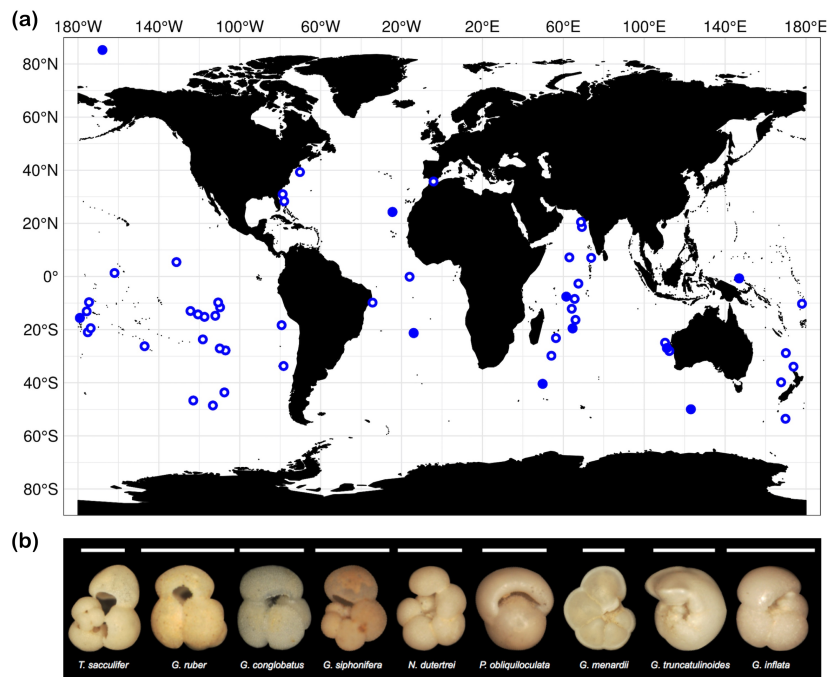

Fig. 1: **(a)** Geographic distribution of the samples used from the Buckley Collection. Each dot on the map includes data on planktonic foraminifera shell size distributions, and corresponding data on relative abundance of species and mean annual values of sea-surface temperature. The filled dots represent the ten samples that were re-sampled to analyse the biases in the Buckley Collection. The sample above 80°N was used just in the collection bias analysis. **(b)** A representative specimen from the Buckley Collection for each species analysed. White bars represent 500  $\mu\text{m}$  (0.5 mm).

Table 1: Overview of the morphometric dataset extracted from the Henry Buckley Collection of Planktonic Foraminifera. Columns: species names; number of individuals measured; number of populations per species (*i.e.*, number of geographical sites, 53 in total); species resolution (*i.e.*, median number of individuals per sample); mounting position in the collection (*i.e.*, position in which the individuals of each species were measured).

| Species                              | N(ind)      | N(pop)     | Resolution | Mounting Position   |
|--------------------------------------|-------------|------------|------------|---------------------|
| <i>Trilobatus sacculifer</i>         | 674         | 38         | 15         | umbilical or spiral |
| <i>Globigerinoides ruber</i>         | 481         | 39         | 10         | umbilical or spiral |
| <i>Globigerinoides conglobatus</i>   | 345         | 38         | 8          | umbilical           |
| <i>Globigerinella siphonifera</i>    | 244         | 37         | 5          | umbilical or spiral |
| <i>Neogloboquadrina dutertrei</i>    | 321         | 30         | 9          | umbilical           |
| <i>Pulleniatina obliquiloculata</i>  | 295         | 32         | 8.5        | edge                |
| <i>Globorotalia menardii</i>         | 665         | 29         | 16         | umbilical or spiral |
| <i>Globorotalia truncatulinoides</i> | 311         | 30         | 8.5        | umbilical           |
| <i>Globorotalia inflata</i>          | 481         | 20         | 17.5       | umbilical           |
| <b>Total</b>                         | <b>3817</b> | <b>293</b> |            |                     |

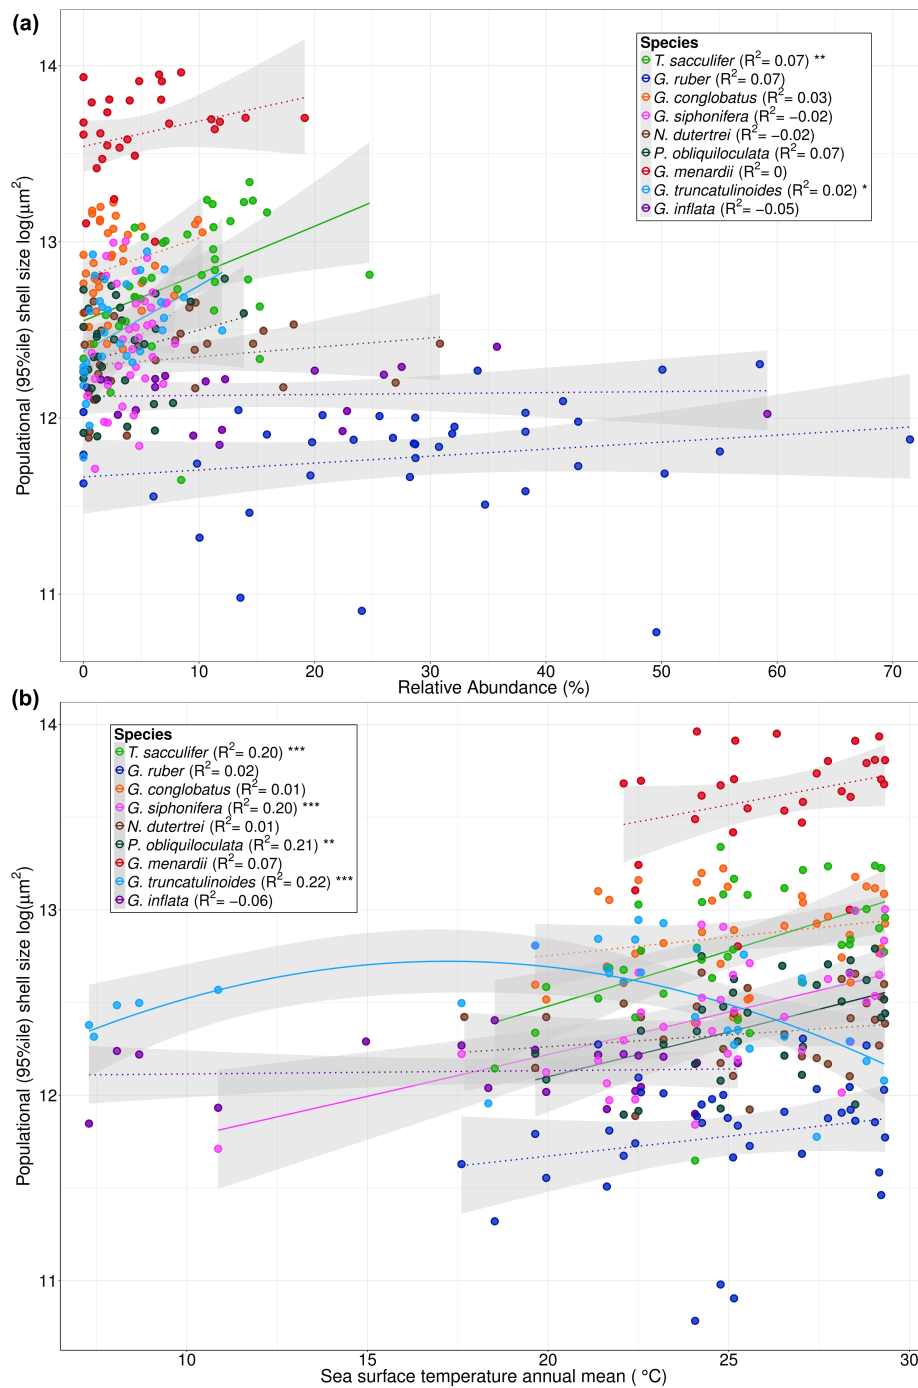

Fig. 2: Relative abundance of species and sea surface temperature do not explain most of the planktonic foraminifera intraspecific size variation. Logarithm of size (represented by the 95th percentile of each population shell size distribution) as a function of (a) relative abundance of species and (b) mean annual sea surface temperature (SST). The lines represent the generalised linear regression. Solid lines show significant relationship whereas dotted lines non-significant; grey shades show standard error of the model. *G. truncatulinoides* best SST fit was a quadratic function (Table 2). The legend shows the adjusted  $R^2$  for each species. Significance codes: '\*\*\*'  $p < 0.001$ ; '\*\*'  $p < 0.01$ ; '\*'  $p < 0.05$ ; ' '  $p \geq 0.05$

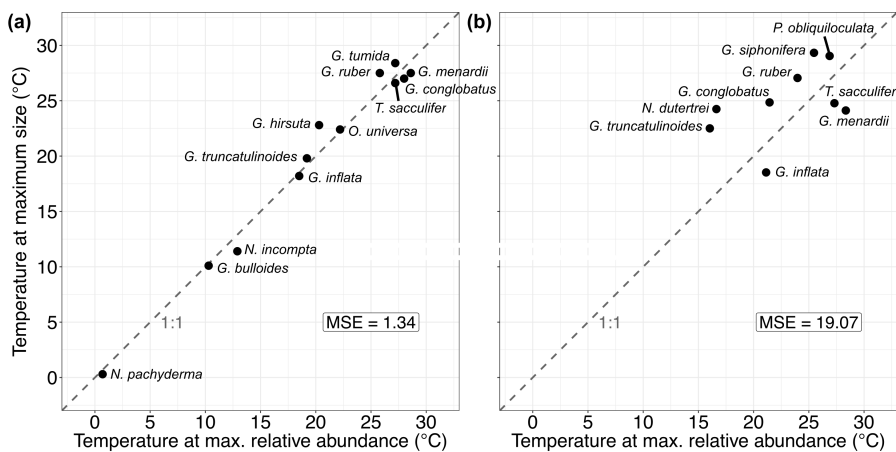

Fig. 3: The sea-surface temperatures at which planktonic foraminifera species reach maximum shell size and maximum relative abundance in the surface sediments. MSE stands for mean squared error with respect to the identity function (1:1 relationship, dashed grey line). **(a)** Data from Schmidt (2002) Table 3.3. **(b)** Data from this study. The current study shows a larger MSE than the one found by Schmidt (2002).

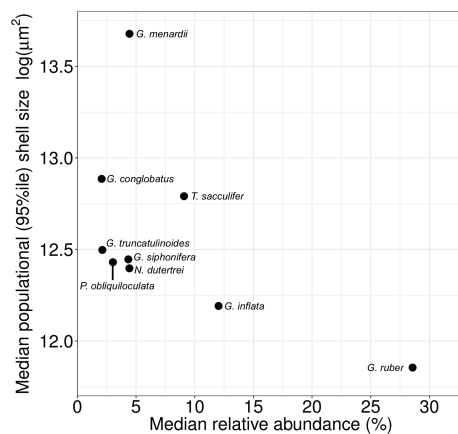

Fig. 4: Relationship between median population shell size (represented by the logarithm of the 95th percentile of each population size distribution) and median relative abundance of each planktonic foraminifera species, within the morphometric dataset. The negative relationship indicates that more abundant species are generally smaller than less abundant ones.

Table 2: Model selection of the generalised linear models (with the Gamma logarithmic error function) testing if planktonic foraminifera shell size (represented by the 95th percentile of each population size distribution) can be predicted by sea surface temperature annual mean (sst) and relative abundance of species (median within 300 km distance) (abund), plus the interaction between these two explanatory variables (sst:abund). Columns: explanatory variables, degrees of freedom, log-likelihood, Akaike Information Criterion corrected for small sample size (AICc), difference in AICc, model weight, adjusted R squared. Explanatory variables in bold indicate best supported model according to model weight.

| Explanatory variables                                  | df | logLik  | AICc   | $\Delta$ AICc | weight | $R^2_{adj}$ |
|--------------------------------------------------------|----|---------|--------|---------------|--------|-------------|
| <i>Trilobatus sacculifer</i>                           |    |         |        |               |        |             |
| <b>sst</b>                                             | 3  | -491.55 | 989.81 | 0.00          | 0.36   | 0.20        |
| sst <sup>2</sup>                                       | 4  | -490.75 | 990.72 | 0.91          | 0.23   | 0.22        |
| sst + abund                                            | 4  | -491.07 | 991.36 | 1.55          | 0.16   | 0.20        |
| <i>Globigerinoides ruber</i>                           |    |         |        |               |        |             |
| <b>null</b>                                            | 2  | -470.04 | 944.42 | 0.00          | 0.26   | 0.00        |
| <b>abund</b>                                           | 3  | -468.87 | 944.42 | 0.01          | 0.26   | 0.07        |
| sst                                                    | 3  | -469.18 | 945.05 | 0.63          | 0.19   | 0.02        |
| <i>Globigerinoides conglobatus</i>                     |    |         |        |               |        |             |
| <b>null</b>                                            | 2  | -488.93 | 982.20 | 0.00          | 0.22   | 0.00        |
| <b>abund</b>                                           | 3  | -487.85 | 982.41 | 0.21          | 0.20   | 0.03        |
| sst + abund                                            | 4  | -486.72 | 982.65 | 0.45          | 0.18   | 0.03        |
| <i>Globigerinella siphonifera</i>                      |    |         |        |               |        |             |
| <b>sst</b>                                             | 3  | -464.99 | 936.72 | 0.00          | 0.53   | 0.20        |
| sst + abund                                            | 4  | -464.84 | 938.93 | 2.22          | 0.18   | 0.20        |
| sst <sup>2</sup>                                       | 4  | -464.99 | 939.22 | 2.50          | 0.15   | 0.18        |
| <i>Neogloboquadrina dutertrei</i>                      |    |         |        |               |        |             |
| <b>null</b>                                            | 2  | -366.22 | 736.89 | 0.00          | 0.36   | 0.00        |
| sst                                                    | 3  | -365.72 | 738.35 | 1.46          | 0.17   | 0.01        |
| abund                                                  | 3  | -365.81 | 738.53 | 1.64          | 0.16   | -0.02       |
| <i>Pulleniatina obliquiloculata</i>                    |    |         |        |               |        |             |
| <b>sst</b>                                             | 3  | -393.81 | 794.47 | 0.00          | 0.52   | 0.21        |
| sst + abund                                            | 4  | -393.57 | 796.62 | 2.15          | 0.18   | 0.22        |
| sst <sup>2</sup>                                       | 4  | -393.77 | 797.03 | 2.56          | 0.15   | 0.19        |
| <i>Globorotalia menardii</i>                           |    |         |        |               |        |             |
| <b>sst<sup>2</sup> + abund + sst<sup>2</sup>:abund</b> | 5  | -391.06 | 794.72 | 0.00          | 0.46   | 0.16        |
| sst + abund + sst:abund                                | 6  | -390.79 | 797.39 | 2.67          | 0.12   | 0.15        |
| sst                                                    | 3  | -395.33 | 797.62 | 2.90          | 0.11   | 0.07        |
| <i>Globorotalia truncatulinoides</i>                   |    |         |        |               |        |             |
| <b>sst<sup>2</sup></b>                                 | 4  | -373.15 | 755.91 | 0.00          | 0.51   | 0.22        |
| sst <sup>2</sup> + abund                               | 5  | -372.80 | 758.10 | 2.20          | 0.17   | 0.18        |
| sst <sup>2</sup> + abund + sst <sup>2</sup> :abund     | 5  | -373.14 | 758.78 | 2.88          | 0.12   | 0.19        |
| <i>Globorotalia inflata</i>                            |    |         |        |               |        |             |
| <b>null</b>                                            | 2  | -232.75 | 470.20 | 0.00          | 0.56   | 0.00        |
| abund                                                  | 3  | -232.70 | 472.89 | 2.69          | 0.15   | -0.05       |
| sst                                                    | 3  | -232.74 | 472.98 | 2.79          | 0.14   | -0.06       |



Table 3: Linear mixed-effects models ANOVA, using population size variation as response variable, species as random effects and fixed effects as sea surface temperature annual mean (sst linear effect, sst<sup>2</sup> quadratic effect), relative abundance of species (median within 300 km distance) (abund), plus the interaction between these two explanatory variables (sst:abund). Columns: fixed effects, degrees of freedom, Akaike Information Criterion, log-likelihood, model deviance, chi-squared, p-value, marginal R squared.

| Fixed effects           | df | AIC    | logLik | dev    | $\chi^2$ | P    | $R_m^2$ |
|-------------------------|----|--------|--------|--------|----------|------|---------|
| null                    | 8  | 136.31 | -60.15 | 120.31 |          |      | 0.00    |
| sst                     | 9  | 130.52 | -56.26 | 112.52 | 7.79     | 0.01 | 0.04    |
| null                    | 9  | 130.52 | -56.26 | 112.52 |          |      | 0.04    |
| sst <sup>2</sup>        | 10 | 131.94 | -55.97 | 111.94 | 0.58     | 0.45 | 0.05    |
| null                    | 8  | 136.31 | -60.15 | 120.31 |          |      | 0.00    |
| abund                   | 9  | 130.75 | -56.38 | 112.75 | 7.56     | 0.01 | 0.03    |
| sst                     | 9  | 130.52 | -56.26 | 112.52 |          |      | 0.04    |
| sst + abund             | 10 | 124.25 | -52.13 | 104.25 | 8.27     | 0.00 | 0.06    |
| abund                   | 9  | 130.75 | -56.38 | 112.75 |          |      | 0.03    |
| sst + abund             | 10 | 124.25 | -52.13 | 104.25 | 8.50     | 0.00 | 0.06    |
| sst + abund             | 10 | 124.25 | -52.13 | 104.25 |          |      | 0.06    |
| sst + abund + sst:abund | 11 | 125.69 | -51.85 | 103.69 | 0.56     | 0.45 | 0.06    |

430 *Acknowledgements* We gratefully acknowledge Andy Purvis and Isabel S. Fenton for in-  
431 sightful discussions throughout the project. We also thank Anieke Brombacher for patient  
432 assistance with the Image-Pro Premier software and, together with Mauro T. C. Sugawara,  
433 for helpful comments in earlier versions of the manuscript.

434 *Authors contribution:* MCR designed the research question, with input from MK. MCR  
435 imaged and measured all the individuals, with input from GM. MCR and THGE designed  
436 the statistical analysis. MCR performed the analysis and wrote the initial draft. All authors  
437 reviewed and edited the manuscript. The authors declare no conflict of interest.

438 *Funding:* MCR is funded by the Graduate School of the National Oceanography Centre  
439 Southampton and DAAD Research Grants for Doctoral Candidates 2016/17 (57210260).  
440 THGE is funded by NERC Advanced Research Fellowship NE/J018163/1.

## 441 **References**

- 442 Aldridge D, Beer C, Purdie D (2012) Calcification in the planktonic foraminifera *globigerina*  
443 *bulloides* linked to phosphate concentrations in surface waters of the north atlantic ocean.  
444 *Biogeosciences* 9(5):1725–1739
- 445 Amante C, Eakins BW (2009) ETOPO1 1 Arc-Minute Global Relief Model: procedures,  
446 data sources and analysis. NOAA Technical Memorandum NESDIS NGDC-24. National  
447 Geophysical Data Center, NOAA.
- 448 Anderson OR, Be AW (1976) A cytochemical fine structure study of phagotrophy in a plank-  
449 tonic foraminifer, *Hastigerina pelagica* (d’Orbigny). *The Biological Bulletin* 151(3):437–  
450 449
- 451 Andre A, Weiner A, Quillevere F, Aurahs R, Morard R, Douady CJ, de Garidel-Thoron  
452 T, Escarguel G, De Vargas C, Kucera M (2013) The cryptic and the apparent reversed:  
453 lack of genetic differentiation within the morphologically diverse plexus of the planktonic  
454 foraminifer *Globigerinoides sacculifer*. *Paleobiology* 39(1):21–39
- 455 Aurahs R, Treis Y, Darling K, Kucera M (2011) A revised taxonomic and phylogenetic  
456 concept for the planktonic foraminifer species *globigerinoides ruber* based on molecular  
457 and morphometric evidence. *Marine Micropaleontology* 79(1-2):1–14
- 458 Barton AD, Pershing AJ, Litchman E, Record NR, Edwards KF, Finkel ZV, Kiørboe T, Ward  
459 BA (2013) The biogeography of marine plankton traits. *Ecology Letters* 16(4):522–534
- 460 Barton K (2017) MuMIn: Multi-Model Inference. URL [https://CRAN.R-project.org/  
461 package=MumIn](https://CRAN.R-project.org/package=MumIn), R package version 1.40.0
- 462 Bates D, Machler M, Bolker B, Walker S (2015) Fitting linear mixed-effects models using  
463 *lme4*. *Journal of Statistical Software* 67(1):1–48
- 464 Be AWH, Anderson OR (1976) Gametogenesis in planktonic foraminifera. *Science*  
465 192(4242):890–892
- 466 Be AWH, Hutson WH (1977) Ecology of planktonic foraminifera and biogeographic pat-  
467 terns of life and fossil assemblages in the Indian Ocean. *Micropaleontology* 23(4):369–  
468 414
- 469 Be AWH, Harrison SM, Lott L (1973) *Orbulina universa* d’Orbigny in the Indian Ocean.  
470 *Micropaleontology* 19(2):150–192
- 471 Be AWH, Caron DA, Anderson OR (1981) Effects of feeding frequency on life processes  
472 of the planktonic foraminifer *Globigerinoides sacculifer* in laboratory culture. *Journal of*  
473 *the Marine Biological Association of the United Kingdom* 61(1):257–277

- 474 Beer CJ, Schiebel R, Wilson PA (2010) Testing planktic foraminiferal shell weight as a  
475 surface water [CO<sub>3</sub><sup>2-</sup>] proxy using plankton net samples. *Geology* 38(2):103–106
- 476 Berger WH, Piper DJ (1972) Planktonic foraminifera: differential settling, dissolution, and  
477 redeposition. *Limnology and Oceanography* 17(2):275–287
- 478 Berlow EL, Dunne JA, Martinez ND, Stark PB, Williams RJ, Brose U (2009) Simple predic-  
479 tion of interaction strengths in complex food webs. *Proceedings of the National Academy*  
480 *of Sciences* 106(1):187–191
- 481 Bijma J, Erez J, Hemleben C (1990a) Lunar and semi-lunar reproductive cycles in some  
482 spinose planktonic foraminifera. *Journal of Foraminiferal Research* 20(2):117–127
- 483 Bijma J, Faber WW, Hemleben C (1990b) Temperature and salinity limits for growth and  
484 survival of some planktonic foraminifera in laboratory cultures. *Journal of Foraminiferal*  
485 *Research* 20(2):95–116
- 486 Bijma J, Hemleben C, Oberhaensli H, Spindler M (1992) The effects of increased water  
487 fertility on tropical spinose planktonic foraminifera in laboratory cultures. *Journal of*  
488 *Foraminiferal Research* 22(3):242–256
- 489 Bolnick DI, Amarasekare P, Araujo MS, Burger R, Levine JM, Novak M, Rudolf VH,  
490 Schreiber SJ, Urban MC, Vasseur DA (2011) Why intraspecific trait variation matters  
491 in community ecology. *Trends in Ecology & Evolution* 26(4):183–192
- 492 Boyce DG, Frank KT, Leggett WC (2015) From mice to elephants: overturning the 'one size  
493 fits all' paradigm in marine plankton food chains. *Ecology Letters* 18(6):504–515
- 494 Brombacher A, Elder LE, Hull PM, Wilson PA, Ezard TH (2018) Calibration of test diameter  
495 and area as proxies for body size in the planktonic foraminifer *Globoconella Puncticulata*.  
496 *Journal of Foraminiferal Research* 48(3):241–245
- 497 Brown JH, Gillooly JF, Allen AP, Savage VM, West GB (2004) Toward a metabolic theory  
498 of ecology. *Ecology* 85(7):1771–1789
- 499 Caron DA, Be AW, Anderson OR (1981) Effects of variations in light intensity on life  
500 processes of the planktonic foraminifer *Globigerinoides sacculifer* in laboratory culture.  
501 *Journal of the Marine Biological Association of the United Kingdom* 62(2):435–451
- 502 Caron DA, Faber WW, Be AWH (1987a) Effects of temperature and salinity on the growth  
503 and survival of the planktonic foraminifer *Globigerinoides sacculifer*. *Journal of the Ma-*  
504 *rine Biological Association of the United Kingdom* 67(2):323–341
- 505 Caron DA, Faber WW, Be AWH (1987b) Growth of the spinose planktonic foraminifer  
506 *Orbulina universa* in laboratory culture and the effect of temperature on life processes.  
507 *Journal of the Marine Biological Association of the United Kingdom* 67(2):343–358
- 508 Damuth J (1981) Population density and body size in mammals. *Nature* 290(5808):699 –  
509 700
- 510 Darling KF, Wade CM (2008) The genetic diversity of planktic foraminifera and the global  
511 distribution of ribosomal rna genotypes. *Marine Micropaleontology* 67(3):216–238
- 512 De Vargas C, Zaninetti L, Hilbrecht H, Pawlowski J (1997) Phylogeny and rates of molecular  
513 evolution of planktonic foraminifera: SSU rDNA sequences compared to the fossil record.  
514 *Journal of Molecular Evolution* 45(3):285–294
- 515 De Vargas C, Norris R, Zaninetti L, Gibb SW, Pawlowski J (1999) Molecular evidence  
516 of cryptic speciation in planktonic foraminifera and their relation to oceanic provinces.  
517 *Proceedings of the National Academy of Sciences* 96(6):2864–2868
- 518 Des Roches S, Post DM, Turley NE, Bailey JK, Hendry AP, Kinnison MT, Schweitzer JA,  
519 Palkovacs EP (2018) The ecological importance of intraspecific variation. *Nature Ecology*  
520 *& Evolution* 2(1):57
- 521 Emmerson MC, Raffaelli D (2004) Predator–prey body size, interaction strength and the  
522 stability of a real food web. *Journal of Animal Ecology* 73(3):399–409

- 523 Ezard TH, Aze T, Pearson PN, Purvis A (2011) Interplay between changing climate and  
524 species' ecology drives macroevolutionary dynamics. *Science* 332(6027):349–351
- 525 Fenchel T (1974) Intrinsic rate of natural increase: the relationship with body size. *Oecologia* 14(4):317–326
- 526
- 527 Fenton IS, Pearson PN, Jones TD, Purvis A (2016) Environmental predictors of diver-  
528 sity in recent planktonic foraminifera as recorded in marine sediments. *PLoS One*  
529 11(11):e0165522
- 530 Gianuca AT, Pantel JH, De Meester L (2016) Disentangling the effect of body size and  
531 phylogenetic distances on zooplankton top-down control of algae. *Proceedings of the*  
532 *Royal Society of London B: Biological Sciences* 283(1828):20160487
- 533 Hart SP, Schreiber SJ, Levine JM (2016) How variation between individuals affects species  
534 coexistence. *Ecology Letters* 19(8):825–838
- 535 Hecht AD (1976) An ecologic model for test size variation in Recent planktonic  
536 foraminifera; applications to the fossil record. *The Journal of Foraminiferal Research*  
537 6(4):295–311
- 538 Hemleben C, Spindler M, Breitingner I, Ott R (1987) Morphological and physiological re-  
539 sponses of *Globigerinoides sacculifer* (Brady) under varying laboratory conditions. *Marine*  
540 *Micropaleontology* 12:305–324
- 541 Hemleben C, Spindler M, Anderson OR (1989) *Modern planktonic foraminifera*, 1st edn.  
542 Springer-Verlag New York Inc.
- 543 Hijmans RJ (2015) *geosphere: Spherical Trigonometry*. URL <https://CRAN.R-project.org/package=geosphere>, R package version 1.5-1
- 544
- 545 Huete-Ortega M, Cermeno P, Calvo-Diaz A, Maranon E (2012) Isometric size-scaling of  
546 metabolic rate and the size abundance distribution of phytoplankton. *Proceedings of the*  
547 *Royal Society of London B: Biological Sciences* 279(1734):1815–1823
- 548 Jennings S, Mackinson S (2003) Abundance–body mass relationships in size-structured food  
549 webs. *Ecology Letters* 6(11):971–974
- 550 Jonkers L, Kucera M (2015) Global analysis of seasonality in the shell flux of extant plank-  
551 tonic foraminifera. *Biogeosciences* 12(7):2207–2226
- 552 Jonkers L, Reynolds CE, Richey J, Hall IR (2015) Lunar periodicity in the shell flux of  
553 planktonic foraminifera in the Gulf of Mexico. *Biogeosciences* 12(10):3061–3070
- 554 Kahn MI (1981) Ecological and paleoecological implications of the phenotypic variation  
555 in three species of living planktonic foraminifera from the northeastern Pacific Ocean  
556 (50°N, 145°W). *Journal of Foraminiferal Research* 11(3):203–211
- 557 Kennett JP (1976) Phenotypic variation in some Recent and late Cenozoic planktonic  
558 foraminifera (in *Foraminifera II*), vol 2, 1st edn, Academic Press New York, pp 111–169
- 559 Kirkpatrick M, Barton NH (1997) Evolution of a species' range. *The American Naturalist*  
560 150(1):1–23
- 561 Kucera M (2007) Planktonic foraminifera as tracers of past oceanic environments (in *De-*  
562 *velopments in Marine Geology*), vol 1, 1st edn, Elsevier, chap 6, pp 213–262
- 563 Liancourt P, Callaway RM, Michalet R (2005) Stress tolerance and competitive-response  
564 ability determine the outcome of biotic interactions. *Ecology* 86(6):1611–1618
- 565 Litchman E, Ohman MD, Kiørboe T (2013) Trait-based approaches to zooplankton commu-  
566 nities. *Journal of Plankton Research* 35(3):473–484
- 567 Locarnini RA, Mishonov AV, Antonov JI, Boyer TP, Garcia HE, Baranova OK, Zweng MM,  
568 Paver CR, Reagan JR, Johnson DR, Hamilton M, Seidov D (2013) *World Ocean Atlas*  
569 2013, Volume 1: Temperature. NOAA Atlas NESDIS 73:1–40
- 570 Malmgren B, Kennett JP (1976) Biometric analysis of phenotypic variation in Recent *Glo-*  
571 *bigerina bulloides* d'Orbigny in the southern Indian Ocean. *Marine Micropaleontology*

- 572 1:3–25
- 573 Malmgren BA, Kennett JP (1977) Biometric differentiation between Recent *Globigerina*  
574 *bulloides* and *Globigerina falconensis* in the southern Indian Ocean. The Journal of  
575 Foraminiferal Research 7(2):131–148
- 576 Moller T, Schulz H, Kucera M (2013) The effect of sea surface properties on shell morphol-  
577 ogy and size of the planktonic foraminifer *Neogloboquadrina pachyderma* in the North  
578 Atlantic. Palaeogeography, Palaeoclimatology, Palaeoecology 391:34–48
- 579 Morard R, Quillevere F, Douady CJ, de Vargas C, de Garidel-Thoron T, Escarguel G (2011)  
580 Worldwide genotyping in the planktonic foraminifer *globocornella inflata*: implications  
581 for life history and paleoceanography. PLoS One 6(10):e26665
- 582 Morard R, Garet-Delmas MJ, Mahe F, Romac S, Poulain J, Kucera M, Vargas C (2018)  
583 Surface ocean metabarcoding confirms limited diversity in planktonic foraminifera but  
584 reveals unknown hyper-abundant lineages. Scientific Reports 8(1):2539
- 585 Morey AE, Mix AC, Pisias NG (2005) Planktonic foraminiferal assemblages preserved in  
586 surface sediments correspond to multiple environment variables. Quaternary Science Re-  
587 views 24(7-9):925–950
- 588 Mousing EA, Ribeiro S, Chisholm C, Kuijpers A, Moros M, Ellegaard M (2017) Size dif-  
589 ferences of Arctic marine protists between two climate periods—using the paleoecological  
590 record to assess the importance of within-species trait variation. Ecology and Evolution  
591 7(1):3–13
- 592 Muller H, Geller W (1993) Maximum growth rates of aquatic ciliated protozoa: the depen-  
593 dence on body size and temperature reconsidered. Archiv fur Hydrobiologie 126:315–327
- 594 Orr HA (2009) Fitness and its role in evolutionary genetics. Nature Reviews Genetics  
595 10(8):531
- 596 Pante E, Simon-Bouhet B (2013) *marmap*: a package for importing, plotting and analyzing  
597 bathymetric and topographic data in R. PLoS One 8(9):e73051
- 598 Petchey OL, Beckerman AP, Riede JO, Warren PH (2008) Size, foraging, and food web  
599 structure. Proceedings of the National Academy of Sciences 105(11):4191–4196
- 600 Peters RH, Wassenberg K (1983) The effect of body size on animal abundance. Oecologia  
601 60(1):89–96
- 602 Quillevere F, Morard R, Escarguel G, Douady CJ, Ujiie Y, de Garidel-Thoron T, De Vargas  
603 C (2013) Global scale same-specimen morpho-genetic analysis of *Truncorotalia truncat-*  
604 *ulinoides*: A perspective on the morphological species concept in planktonic foraminifera.  
605 Palaeogeography, Palaeoclimatology, Palaeoecology 391:2–12
- 606 Rehfeldt GE, Leites LP, Joyce DG, Weiskittel AR (2018) Role of population genetics in  
607 guiding ecological responses to climate. Global Change Biology 24(2):858–868
- 608 Reuman DC, Mulder C, Raffaelli D, Cohen JE (2008) Three allometric relations of popu-  
609 lation density to body mass: theoretical integration and empirical tests in 149 food webs.  
610 Ecology Letters 11(11):1216–1228
- 611 Rillo MC, Whittaker J, Ezard THG, Purvis A, Henderson AS, Stukins S, Miller CG (2016)  
612 The unknown planktonic foraminiferal pioneer Henry A. Buckley and his collection at  
613 the Natural History Museum, London. Journal of Micropalaeontology 36(2):191–194
- 614 Rillo MC, Kucera M, Ezard THG, Miller CG (2018) (preprint) Surface sediment samples  
615 from early age of seafloor exploration can provide a late 19th century baseline of the  
616 marine environment. bioRxiv DOI <https://doi.org/10.1101/419770>
- 617 Rutherford S, D'Hondt S, Prell W (1999) Environmental controls on the geographic distri-  
618 bution of zooplankton diversity. Nature 400(6746):749
- 619 Sagarin RD, Gaines SD (2002) The 'abundant centre' distribution: to what extent is it a  
620 biogeographical rule? Ecology Letters 5(1):137–147

- 621 Savage VM, Gillooly JF, Brown JH, West GB, Charnov EL (2004) Effects of body size and  
622 temperature on population growth. *The American Naturalist* 163(3):429–441
- 623 Schmidt DN (2002) Size variability in planktic foraminifers. PhD thesis, ETH Zurich,  
624 <https://doi.org/10.3929/ethz-a-004353260>
- 625 Schmidt DN, Renaud S, Bollmann J, Schiebel R, Thierstein HR (2004) Size distribution  
626 of Holocene planktic foraminifer assemblages: biogeography, ecology and adaptation.  
627 *Marine Micropaleontology* 50(3):319–338
- 628 Schmidt DN, Lazarus D, Young JR, Kucera M (2006) Biogeography and evolution of body  
629 size in marine plankton. *Earth-Science Reviews* 78(3-4):239–266
- 630 Seears HA, Darling KF, Wade CM (2012) Ecological partitioning and diversity in tropical  
631 planktonic foraminifera. *BMC Evolutionary Biology* 12(1):54
- 632 Siccha M, Kucera M (2017) ForCenS, a curated database of planktonic foraminifera census  
633 counts in marine surface sediment samples. *Scientific Data* 4:170109
- 634 Sommer U, Peter KH, Genitsaris S, Moustaka-Gouni M (2017) Do marine phytoplankton  
635 follow Bergmann's rule *sensu lato*? *Biological Reviews* 92(2):1011–1026
- 636 Tittensor DP, Mora C, Jetz W, Lotze HK, Ricard D, Berghe EV, Worm B (2010) Global  
637 patterns and predictors of marine biodiversity across taxa. *Nature* 466(7310):1098
- 638 Ujiie Y, Asami T, de Garidel-Thoron T, Liu H, Ishitani Y, de Vargas C (2012) Longitudinal  
639 differentiation among pelagic populations in a planktic foraminifer. *Ecology and Evolu-*  
640 *tion* 2(7):1725–1737
- 641 Van Sebille E, Scussolini P, Durgadoo JV, Peeters FJ, Biastoch A, Weijer W, Turney C,  
642 Paris CB, Zahn R (2015) Ocean currents generate large footprints in marine palaeoclimate  
643 proxies. *Nature Communications* 6:6521
- 644 Villarino E, Watson JR, Jonsson B, Gasol JM, Salazar G, Acinas SG, Estrada M, Massana R,  
645 Logares R, Giner CR, et al. (2018) Large-scale ocean connectivity and planktonic body  
646 size. *Nature Communications* 9(1):142
- 647 Violle C, Enquist BJ, McGill BJ, Jiang L, Albert CH, Hulshof C, Jung V, Messier J (2012)  
648 The return of the variance: intraspecific variability in community ecology. *Trends in Ecology*  
649 *& Evolution* 27(4):244–252
- 650 Wang Y, Chu C, Maestre FT, Wang G (2008) On the relevance of facilitation in alpine  
651 meadow communities: an experimental assessment with multiple species differing in their  
652 ecological optimum. *Acta Oecologica* 33(1):108–113
- 653 Weiner AK, Weinkauf MF, Kurasawa A, Darling KF, Kucera M, Grimm GW (2014) Phylo-  
654 geography of the tropical planktonic foraminifera lineage *Globigerinella* reveals isolation  
655 inconsistent with passive dispersal by ocean currents. *PLoS One* 9(3):e92148
- 656 Weinkauf MF, Kunze JG, Waniek JJ, Kucera M (2016) Seasonal variation in shell calcifi-  
657 cation of planktonic foraminifera in the NE Atlantic reveals species-specific response to  
658 temperature, productivity, and optimum growth conditions. *PLoS One* 11(2):e0148363
- 659 White EP, Ernest SM, Kerkhoff AJ, Enquist BJ (2007) Relationships between body size and  
660 abundance in ecology. *Trends in Ecology & Evolution* 22(6):323–330
- 661 Woodward G, Ebenman B, Emmerson M, Montoya JM, Olesen JM, Valido A, Warren PH  
662 (2005) Body size in ecological networks. *Trends in Ecology & Evolution* 20(7):402–409
- 663 Yvon-Durocher G, Reiss J, Blanchard J, Ebenman B, Perkins DM, Reuman DC, Thierry  
664 A, Woodward G, Petchey OL (2011) Across ecosystem comparisons of size structure:  
665 methods, approaches and prospects. *Oikos* 120(4):550–563
- 666 Zhang D (2017) A coefficient of determination for generalized linear models. *The American*  
667 *Statistician* 71(4):310–316



668 **Supplementary Information**

669 **S1 Expeditions**

Table S1: Information about the samples from the Henry Buckley Collection of Planktonic Foraminifera at The Natural History Museum, London (NHMUK) used in our morphometric analysis. Columns: NHMUK Internal Record Number of the sediment in the Ocean-Bottom Deposits Collection (OBD IRN); name of the Vessel that collected the sample; Year the sample was collected; latitude (Lat) and longitude (Long) given in decimal degrees; sea surface temperature (SST) in Celsius degrees; water Depth in meters; Sampling method used in the historical expedition (extracted from OBD Collection metadata); depth below the sea floor (Dbsf) sampled in centimetres; number of individuals, N(ind), and species, N(ssp), measured at each site.

| OBD IRN    | Vessel                     | Year | Lat    | Long    | SST   | Depth(m) | Sampling       | Dbsf(cm) | N(ind) | N(ssp) |
|------------|----------------------------|------|--------|---------|-------|----------|----------------|----------|--------|--------|
| 31945      | CS <i>Britannia</i>        | 1899 | 39.21  | -70.24  | 19.25 | -2731    | Sounding       | surface  | 65     | 1      |
| 34297      | CS <i>Buccaneer</i>        | 1886 | -0.03  | -15.94  | 26.30 | -3226    | Sounding       | surface  | 57     | 1      |
| 30724      | HEMS <i>Mabahiss</i>       | 1934 | 7.19   | 63.04   | 28.38 | -4346    | Core           | 4-5.5    | 53     | 7      |
| 35818      | HMIMS <i>Investigator</i>  | 1906 | 20.44  | 68.84   | 27.24 | -2680    | Sounding       | surface  | 56     | 5      |
| 17229      | HMNZS <i>Lachlan</i>       | 1955 | -33.88 | 173.83  | 17.80 | -2464    | Worsel sampler | surface  | 106    | 8      |
| 17262      | HMNZS <i>Pukaki</i>        | 1957 | -53.63 | 169.87  | 7.95  | -746     | Dietz grab     | surface  | 52     | 2      |
| 33286      | HMS <i>Challenger</i>      | 1873 | 24.33  | -24.47  | 23.16 | -5153    | Sounding       | surface  | 46     | 1      |
| 32657      | HMS <i>Challenger</i>      | 1874 | -50.02 | 123.07  | 9.32  | -3976    | Sounding       | surface  | 11     | 1      |
| 33668      | HMS <i>Challenger</i>      | 1875 | -0.70  | 147.00  | 29.40 | -2213    | Sounding       | surface  | 95     | 7      |
| 34607      | HMS <i>Challenger</i>      | 1875 | -33.70 | -78.30  | 16.79 | -3798    | Sounding       | surface  | 8      | 1      |
| 34991      | HMS <i>Challenger</i>      | 1876 | -21.25 | -14.03  | 23.61 | -3740    | Dredge         | surface  | 181    | 8      |
| 34671      | HMS <i>Egeria</i>          | 1887 | -19.57 | 64.63   | 24.83 | -2708    | Sounding       | surface  | 66     | 8      |
| 34676      | HMS <i>Egeria</i>          | 1887 | -23.23 | 56.30   | 25.14 | -4646    | Sounding       | surface  | 73     | 9      |
| 34678      | HMS <i>Egeria</i>          | 1887 | -29.93 | 54.10   | 21.13 | -4211    | Sounding       | surface  | 63     | 8      |
| 34993      | HMS <i>Egeria</i>          | 1889 | -15.65 | -179.06 | 28.05 | -2519    | Sounding       | surface  | 124    | 8      |
| 35238      | HMS <i>Egeria</i>          | 1894 | 7.08   | 73.80   | 28.57 | -2658    | Sounding       | surface  | 66     | 7      |
| 16621      | HMS <i>Enterprise</i>      | 1962 | 30.90  | -78.68  | 26.63 | -821     | Dredge         | surface  | 35     | 1      |
| 36043      | HMS <i>Penguin</i>         | 1891 | -28.01 | 112.46  | 21.94 | -1206    | Sounding       | surface  | 189    | 9      |
| 36053      | HMS <i>Penguin</i>         | 1891 | -26.94 | 111.18  | 22.66 | -3350    | Sounding       | surface  | 203    | 9      |
| 36057      | HMS <i>Penguin</i>         | 1891 | -24.89 | 110.39  | 22.83 | -3829    | Sounding       | surface  | 193    | 9      |
| 36361      | HMS <i>Penguin</i>         | 1896 | -10.21 | 178.01  | 28.91 | -4844    | Sounding       | surface  | 123    | 8      |
| 36515      | HMS <i>Penguin</i>         | 1897 | -9.68  | -174.62 | 28.05 | -4057    | Sounding       | surface  | 71     | 6      |
| 36683      | HMS <i>Penguin</i>         | 1897 | 1.21   | -161.84 | 27.32 | -4634    | Sounding       | surface  | 47     | 8      |
| 36704      | HMS <i>Penguin</i>         | 1897 | -13.17 | -175.69 | 28.05 | -3952    | Sounding       | surface  | 111    | 7      |
| 37130      | HMS <i>Sealark</i>         | 1905 | -8.42  | 65.63   | 28.35 | -3694    | Sounding       | surface  | 78     | 7      |
| 37148      | HMS <i>Sealark</i>         | 1905 | -7.59  | 61.48   | 28.06 | -3507    | Sounding       | surface  | 87     | 8      |
| 37149      | HMS <i>Sealark</i>         | 1905 | -2.70  | 67.38   | 28.95 | -3594    | Sounding       | surface  | 119    | 7      |
| 37190      | HMS <i>Sealark</i>         | 1905 | -12.12 | 64.12   | 27.16 | -3322    | Sounding       | surface  | 72     | 7      |
| 37299      | HMS <i>Serpent</i>         | 1868 | 18.63  | 69.17   | 27.85 | -3261    | Sounding       | surface  | 9      | 1      |
| 38482      | HMS <i>Waterwitch</i>      | 1895 | -40.45 | 49.82   | 7.78  | -3780    | Sounding       | surface  | 39     | 2      |
| 17031      | RNZEA <i>Tui</i>           | 1956 | -39.77 | 167.75  | 16.04 | -1137    | Dietz grab     | surface  | 71     | 4      |
| 17240      | RNZEA <i>Tui</i>           | 1956 | -28.88 | 170.00  | 22.18 | -3021    | Dietz grab     | surface  | 165    | 8      |
| 17273      | RNZEA <i>Tui</i>           | 1958 | -20.95 | -175.23 | 25.66 | -869     | Cone dredge    | surface  | 40     | 6      |
| 16657      | RV <i>Argo</i>             | 1960 | -16.42 | 66.03   | 26.20 | -2810    | Core           | 4-9      | 60     | 8      |
| 16365      | RV <i>Horizon</i>          | 1953 | -19.48 | -173.73 | 25.66 | -4347    | Gravity core   | 5-10     | 43     | 4      |
| 16640      | RV <i>Horizon</i>          | 1953 | -13.09 | -124.28 | 26.67 | -3456    | Gravity core   | 4-8      | 58     | 7      |
| 16641      | RV <i>Horizon</i>          | 1953 | -14.27 | -120.68 | 25.97 | -3617    | Gravity core   | 4-8      | 41     | 6      |
| 16642      | RV <i>Horizon</i>          | 1953 | -15.22 | -117.51 | 25.97 | -3641    | Gravity core   | 1-4      | 32     | 5      |
| 16656      | RV <i>Horizon</i>          | 1958 | -23.61 | -118.22 | 23.98 | -3362    | Gravity core   | 7-11     | 48     | 5      |
| (1971_087) | RV <i>Maria Paolina G</i>  | 1970 | 35.68  | -4.08   | 18.17 | -1500    | Sphincter core | 0-5      | 40     | 3      |
| 16645      | RV <i>Spencer F. Baird</i> | 1957 | 5.43   | -131.32 | 27.65 | -3415    | Gravity core   | 7-10     | 51     | 6      |
| 16646      | RV <i>Spencer F. Baird</i> | 1957 | -26.32 | -147.12 | 21.85 | -2312    | Gravity core   | 3-7      | 54     | 6      |
| 16647      | RV <i>Spencer F. Baird</i> | 1957 | -46.75 | -123.00 | 9.91  | -4030    | Gravity core   | 6-11     | 53     | 2      |
| 16648      | RV <i>Spencer F. Baird</i> | 1957 | -48.48 | -113.28 | 8.06  | -2677    | Gravity core   | 0-8      | 41     | 2      |
| 16649      | RV <i>Spencer F. Baird</i> | 1957 | -43.72 | -107.60 | 10.99 | -3141    | Gravity core   | 3-7      | 17     | 3      |
| 16370      | RV <i>Spencer F. Baird</i> | 1958 | -11.70 | -109.72 | 25.27 | -3296    | Gravity core   | 0-3      | 1      | 1      |
| 16650      | RV <i>Spencer F. Baird</i> | 1958 | -18.33 | -79.34  | 20.07 | -3157    | Gravity core   | 8-12     | 49     | 7      |
| 16651      | RV <i>Spencer F. Baird</i> | 1958 | -27.93 | -106.92 | 21.45 | -3039    | Gravity core   | 8-15     | 67     | 6      |
| 16652      | RV <i>Spencer F. Baird</i> | 1958 | -27.15 | -109.83 | 21.45 | -2819    | Gravity core   | 10-14    | 51     | 5      |
| 16653      | RV <i>Spencer F. Baird</i> | 1958 | -14.73 | -112.10 | 24.90 | -3034    | Gravity core   | 12-15    | 69     | 7      |
| 16654      | RV <i>Spencer F. Baird</i> | 1958 | -9.88  | -110.68 | 25.26 | -2712    | Gravity core   | 5-9      | 46     | 7      |
| 17162      | RV <i>Vema</i>             | 1959 | 28.40  | -77.93  | 24.89 | -1004    | Piston core    | 0-2      | 136    | 8      |
| 17359      | RV <i>Vema</i>             | 1959 | -9.75  | -34.40  | 27.14 | -4123    | Piston core    | 5-6      | 86     | 6      |

670 **S2 Species list and shell area histograms**

**Modern species**

*Beella digitata*  
*Berggrenia pumilio*  
*Candeina nitida*  
*Globigerina bulloides*  
*Globigerina falconensis*  
*Globigerinella adamsi*  
*Globigerinella calida*  
*Globigerinella siphonifera*  
*Globigerinina glutinata*  
*Globigerinoides conglomeratus*  
*Globigerinoides ruber*  
*Globoquadrina conglomerata*  
*Globorotalia crassaformis*  
*Globorotalia hirsuta*  
*Globorotalia inflata*  
*Globorotalia menardii*  
*Globorotalia scitula*  
*Globorotalia truncatulinoides*  
*Globorotalia tumida*  
*Globorotaloides hexagonus*  
*Globoturborotalita rubescens*  
*Globoturborotalita tenella*  
*Hastigerina pelagica*  
*Neogloboquadrina dutertrei*  
*Neogloboquadrina pachyderma*  
*Orbulina universa*  
*Pulleniatina obliquiloculata*  
*Sphaeroidinella dehiscens*  
*Tenuitella iota*  
*Trilobatus sacculifer*  
*Turborotalita humilis*  
*Turborotalita quinqueloba*

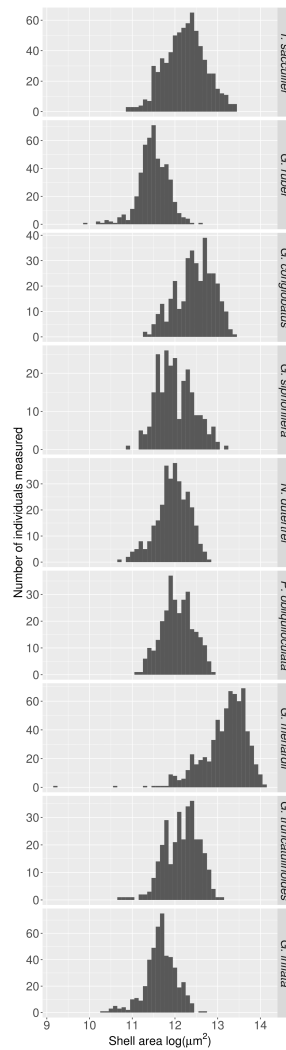

Table S2: List of all species present in the sea-floor sediment samples of the Buckley Collection selected to amass our morphometric dataset. Only extant species are present in these samples. Species and genus names were updated to their modern names.

Fig. S1: Shell area histograms for each of the nine species in our planktonic foraminifera size dataset. Total of 3817 individuals measured. See also Table 1.

671 **S3 Museum collection shell size bias analysis**

672 The Buckley Collection could have a collector effort bias towards larger (or smaller) spec-  
673 imens, resulting in distorted shell size distributions. To assess this bias, we re-sampled ten  
674 original bulk sediments of the NHMUK Ocean-Bottom Deposits Collection (OBD) Collec-  
675 tion, from which the Buckley Collection was created (Fig. 1a, Table SI S3). Samples were  
676 chosen to encompass different oceans, latitudes and marine expeditions; however, the final  
677 choice also depended on the availability of bulk sediment samples in the OBD Collection.

678 Half of the amount available in the OBD containers was further split into two equal parts,  
679 leaving an archive sample and a sample to be processed. The sample processing consisted  
680 of weighing, wet washing over a  $63\mu\text{m}$  sieve and drying in a  $60^\circ\text{C}$  oven. The residues were  
681 further dry sieved over a  $150\mu\text{m}$  sieve and the coarser fraction was split with a microsplitter  
682 as many times as needed to produce a representative aliquot containing around 300 PF shells.  
683 All PF specimens in each of the nine final splits were identified by MCR and MK under a  
684 stereomicroscope to species level, resulting in a total of 2,611 individuals belonging to 31  
685 species (see also Rillo et al. 2018). This way, we calculated the relative abundance of each  
686 species in each sample.

687 We then mounted species-specific slides from the re-sampled samples and extracted  
688 shell size data in the same way as for the slides of the Buckley Collection (section 2.2).  
689 Only species also present in the Buckley Collection samples were measured, resulting in  
690 1824 specimens from 20 species (Table SI S3). For each species in each sample, we log-  
691 transformed its population shell size distribution and calculated the mean, median, 75th  
692 percentile, 95th percentile and maximum value of each distribution. We then regressed each  
693 of these five metrics of the Buckley Collection against the re-sampled data and calculated the  
694 mean squared error with respect to the identity function (1:1 relationship). This comparison  
695 included 65 populations from 2873 individuals (1824 from the re-sampled samples and 1049  
696 from the Buckley Collection samples), all collected in the ten sites (Fig. 1a, Table SI S3).  
697 The mean squared error was lowest for the 95th percentile (Fig. SI S2), meaning that this  
698 metric is the least biased measurement of the Buckley Collection when considering log-  
699 transformed shell area.

Table S3: Information about the samples re-sampled from the Ocean Bottom Deposits Collection at The Natural History Museum, London (NHMUK) used in our museum collection size bias analysis. Columns: NHMUK Internal Record Number of the sediment in the Ocean-Bottom Deposits Collection (OBD IRN); name of the Vessel that collected the sample; latitude (Lat) and longitude (Long) given in decimal degrees; water depth in meters; sampled mass in grams; number of times washed sediment was split, N(splits), until around 300 individuals; number of planktonic foraminifera specimens, N(ind), and species, N(ssp), measured in each re-sampled sample. For more information, see Table SI S1.

| OBD IRN      | Vessel         | Lat    | Long    | Depth (m) | Mass (g) | N(splits) | N(ind) | N(ssp) |
|--------------|----------------|--------|---------|-----------|----------|-----------|--------|--------|
| 32657        | HMS Challenger | -50.02 | 123.07  | -3976     | 0.19     | 5         | 14     | 1      |
| 34991        | HMS Challenger | -21.25 | -14.03  | -3740     | 9.35     | 7         | 239    | 11     |
| 33668        | HMS Challenger | -0.70  | 147.00  | -2213     | 1.98     | 7         | 185    | 7      |
| 33286        | HMS Challenger | 24.33  | -24.47  | -5153     | 2.73     | 5         | 31     | 3      |
| 34671        | HMS Egeria     | -19.57 | 64.63   | -2708     | 1.23     | 5         | 348    | 11     |
| 34993        | HMS Egeria     | -15.65 | -179.06 | -2519     | 2.42     | 8         | 262    | 8      |
| 36053        | HMS Penguin    | -26.94 | 111.18  | -3350     | 1.49     | 5         | 230    | 10     |
| 37148        | HMS Sealark    | -7.59  | 61.48   | -3507     | 2.86     | 8         | 222    | 11     |
| 38482        | HMS Waterwitch | -40.45 | 49.82   | -3780     | 1.51     | 6         | 67     | 2      |
| 14609        | Alpha 6        | 85.25  | -167.90 | -1774     | 0.57     | 4         | 226    | 1      |
| <b>TOTAL</b> |                |        |         |           |          |           | 1824   | 20     |

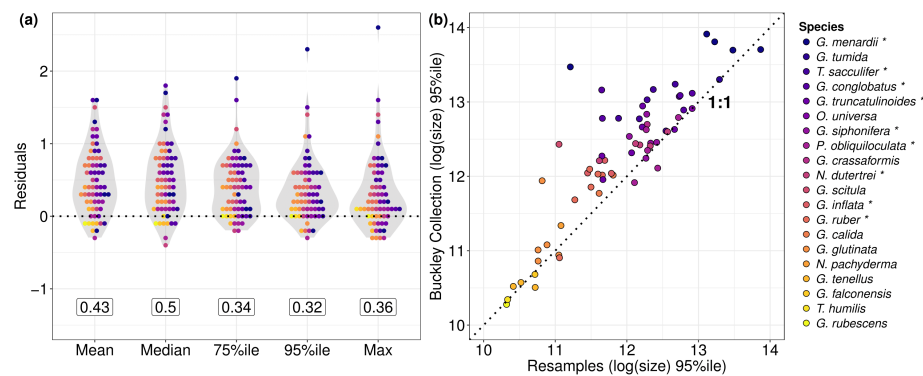

Fig. S2: Difference in shell size distributions between populations of the re-sampled samples and the Buckley Collection samples. Species are coloured and ordered by shell size (larger sizes in purple-blue, smaller sizes in orange-yellow); species marked with (\*) were present in our worldwide morphometric dataset. (a) Residuals were calculated between the Buckley Collection and the re-sampled samples with respect to the identity function (1:1 relationship), using log-transformed population shell sizes. Numbers indicate mean squared error (MSE). (b) Plot of the 95th percentile of the log-transformed population shell size distributions from the Buckley Collection against the re-sampled samples, line 1:1 represents the identity function.

700 S3.1 Linear mixed-effects regression using the re-sampled populations (bias analysis)

701 Using the re-sampled data described above, we tested whether relative abundance variation  
 702 significantly explains population shell size variation. Since the re-sampled data includes  
 703 only ten samples (Fig. 1a), there were not enough populations within each species to use

704 species-specific GLM. Instead, we used linear mixed-effect models. The log-transformed  
705 95th percentile of the population shell size distributions was modelled as the response vari-  
706 able, and the independent fixed effect was the local relative abundance (median within 300  
707 km distance). Species were modelled as random effects, allowing for random intercepts and  
708 slopes (*i.e.*, the intercept and slope of the relationship between shell size and the relative  
709 abundance may vary among species). We used the Likelihood Ratio Test (LRT) to com-  
710 pare the likelihood of the fixed effect. We calculated the LRT between the models with and  
711 without the effect. Significance of each fixed effect was given through the LRT. Marginal  
712  $R^2$  ( $R_m^2$ ), which is associated with the fixed effects, was calculated for each LMER model  
713 (Barton, 2017).

Table S4: Linear mixed-effects models ANOVA, using population size variation as response variable, species as random effects (r.e.) and either a null model (H0) or relative abundance (H1) as explanatory variable. Columns: model explanatory variables (fixed effects), degrees of freedom, Akaike Information Criterion, log-likelihood, model deviance, chi-squared, p-value, marginal R squared.

| Explanatory variables | df | AIC    | logLik | dev    | $\chi^2$ | P    | $R_m^2$ |
|-----------------------|----|--------|--------|--------|----------|------|---------|
| H0: 1 + r.e.          | 5  | 130.20 | -60.10 | 120.20 |          |      | 0.00    |
| H1: (abund) + r.e.    | 6  | 130.02 | -59.01 | 118.02 | 2.18     | 0.14 | 0.07    |

#### 714 S4 Dissolution results

715 We carried out a linear-mixed effect model (LMER) using the log-transformed 95th per-  
716 centile of the population shell size as the response variable, and each sample's water depth  
717 as the independent fixed variable (effect) (see depths in Table SI S1). Species were modelled  
718 as random effects, allowing for random intercepts and slopes, which takes into account in-  
719 terspecific variation on resistance to dissolution. We used LRT to test for significance of the  
720 fixed effect. If dissolution affected our results, we would expect water depth to significantly  
721 explain part of the population shell size variation we found. However, the LMER results  
722 show that water depth is not a significant explanatory variable of PF population shell size  
723 variation in our dataset (p-value > 0.05, Table SI S5).

Table S5: Linear mixed-effects models ANOVA, using population size variation as response variable, species as random effects and either a null model (H0) or water depth (H1) as explanatory variable. Columns: model explanatory variables (fixed effects), degrees of freedom, Akaike Information Criterion, log-likelihood, model deviance, chi-squared, p-value, marginal R squared.

| Explanatory variables    | df | AIC    | logLik | dev    | $\chi^2$ | P    | $R_m^2$ |
|--------------------------|----|--------|--------|--------|----------|------|---------|
| H0: 1 + r.e.             | 5  | 151.19 | -70.60 | 141.19 |          |      | 0.00    |
| H1: (water depth) + r.e. | 6  | 151.36 | -69.68 | 139.36 | 1.83     | 0.18 | 0.00    |

724 **S5 Nearest neighbour results**

725 We ran the same generalised linear models (GLM) analysis as described in section 2, but  
 726 using the species relative abundance retrieved from the nearest neighbouring sample of the  
 727 ForCenS database (instead of the median relative abundance of the samples within 300 km  
 728 distance). Although the order of the best-supported models changed for some species, the  
 729 models weights and the  $\Delta$ AICc are still consistent when compared to the model using the  
 730 median relative abundance within 300 km radius (Table 2). One example is *G. ruber*: here  
 731 the best supported model is the abundance one (Table SI S6) whereas for the median relative  
 732 abundance within 300 km the best supported model is the null model (abund, Table 2).  
 733 However, the  $\Delta$ AICc between these two models of *G. ruber* is close to zero (0.02) as well  
 734 as the difference in the models weights (0.01), consistent with Table 2.

Table S6: Model selection of the generalised linear models (with the Gamma logarithmic error function) testing if planktonic foraminifera shell size (represented by the 95th percentile of each population size distribution) can be predicted by sea surface temperature annual mean (sst) and relative abundance of species (nearest neighbouring ForCenS sample) (abund), plus the interaction between these two explanatory variables (sst:abund). Columns: explanatory variables, degrees of freedom, log-likelihood, Akaike Information Criterion corrected for small sample size, difference in AICc, model weight, adjusted R squared.

| Explanatory variables                              | df | logLik  | AICc   | $\Delta$ AICc | weight | adj. R <sup>2</sup> |
|----------------------------------------------------|----|---------|--------|---------------|--------|---------------------|
| <b><i>Trilobatus sacculifer</i></b>                |    |         |        |               |        |                     |
| sst                                                | 3  | -491.55 | 989.81 | 0.00          | 0.36   | 0.20                |
| sst <sup>2</sup>                                   | 4  | -490.75 | 990.72 | 0.91          | 0.23   | 0.22                |
| sst + abund                                        | 4  | -491.07 | 991.36 | 1.55          | 0.16   | 0.20                |
| <b><i>Globigerinoides ruber</i></b>                |    |         |        |               |        |                     |
| null                                               | 2  | -470.04 | 944.42 | 0.00          | 0.26   | 0.00                |
| abund                                              | 3  | -468.87 | 944.42 | 0.01          | 0.26   | 0.07                |
| sst                                                | 3  | -469.18 | 945.05 | 0.63          | 0.19   | 0.02                |
| <b><i>Globigerinoides conglobatus</i></b>          |    |         |        |               |        |                     |
| null                                               | 2  | -488.93 | 982.20 | 0.00          | 0.22   | 0.00                |
| abund                                              | 3  | -487.85 | 982.41 | 0.21          | 0.20   | 0.03                |
| sst + abund                                        | 4  | -486.72 | 982.65 | 0.45          | 0.18   | 0.03                |
| <b><i>Globigerinella siphonifera</i></b>           |    |         |        |               |        |                     |
| sst                                                | 3  | -464.99 | 936.72 | 0.00          | 0.53   | 0.20                |
| sst + abund                                        | 4  | -464.84 | 938.93 | 2.22          | 0.18   | 0.20                |
| sst <sup>2</sup>                                   | 4  | -464.99 | 939.22 | 2.50          | 0.15   | 0.18                |
| <b><i>Neogloboquadrina dutertrei</i></b>           |    |         |        |               |        |                     |
| null                                               | 2  | -366.22 | 736.89 | 0.00          | 0.36   | 0.00                |
| sst                                                | 3  | -365.72 | 738.35 | 1.46          | 0.17   | 0.01                |
| abund                                              | 3  | -365.81 | 738.53 | 1.64          | 0.16   | -0.02               |
| <b><i>Pulleniatina obliquiloculata</i></b>         |    |         |        |               |        |                     |
| sst                                                | 3  | -393.81 | 794.47 | 0.00          | 0.52   | 0.21                |
| sst + abund                                        | 4  | -393.57 | 796.62 | 2.15          | 0.18   | 0.22                |
| sst <sup>2</sup>                                   | 4  | -393.77 | 797.03 | 2.56          | 0.15   | 0.19                |
| <b><i>Globorotalia menardii</i></b>                |    |         |        |               |        |                     |
| sst <sup>2</sup> + abund + sst <sup>2</sup> :abund | 5  | -391.06 | 794.72 | 0.00          | 0.46   | 0.16                |
| sst + abund + sst:abund                            | 6  | -390.79 | 797.39 | 2.67          | 0.12   | 0.15                |
| sst                                                | 3  | -395.33 | 797.62 | 2.90          | 0.11   | 0.07                |
| <b><i>Globorotalia truncatulinoides</i></b>        |    |         |        |               |        |                     |
| sst <sup>2</sup>                                   | 4  | -373.15 | 755.91 | 0.00          | 0.51   | 0.22                |
| sst <sup>2</sup> + abund                           | 5  | -372.80 | 758.10 | 2.20          | 0.17   | 0.18                |
| sst <sup>2</sup> + abund + sst <sup>2</sup> :abund | 5  | -373.14 | 758.78 | 2.88          | 0.12   | 0.19                |
| <b><i>Globorotalia inflata</i></b>                 |    |         |        |               |        |                     |
| null                                               | 2  | -232.75 | 470.20 | 0.00          | 0.56   | 0.00                |
| abund                                              | 3  | -232.70 | 472.89 | 2.69          | 0.15   | -0.05               |
| sst                                                | 3  | -232.74 | 472.98 | 2.79          | 0.14   | -0.06               |



735 **S6 Boxplots of each species each sample**

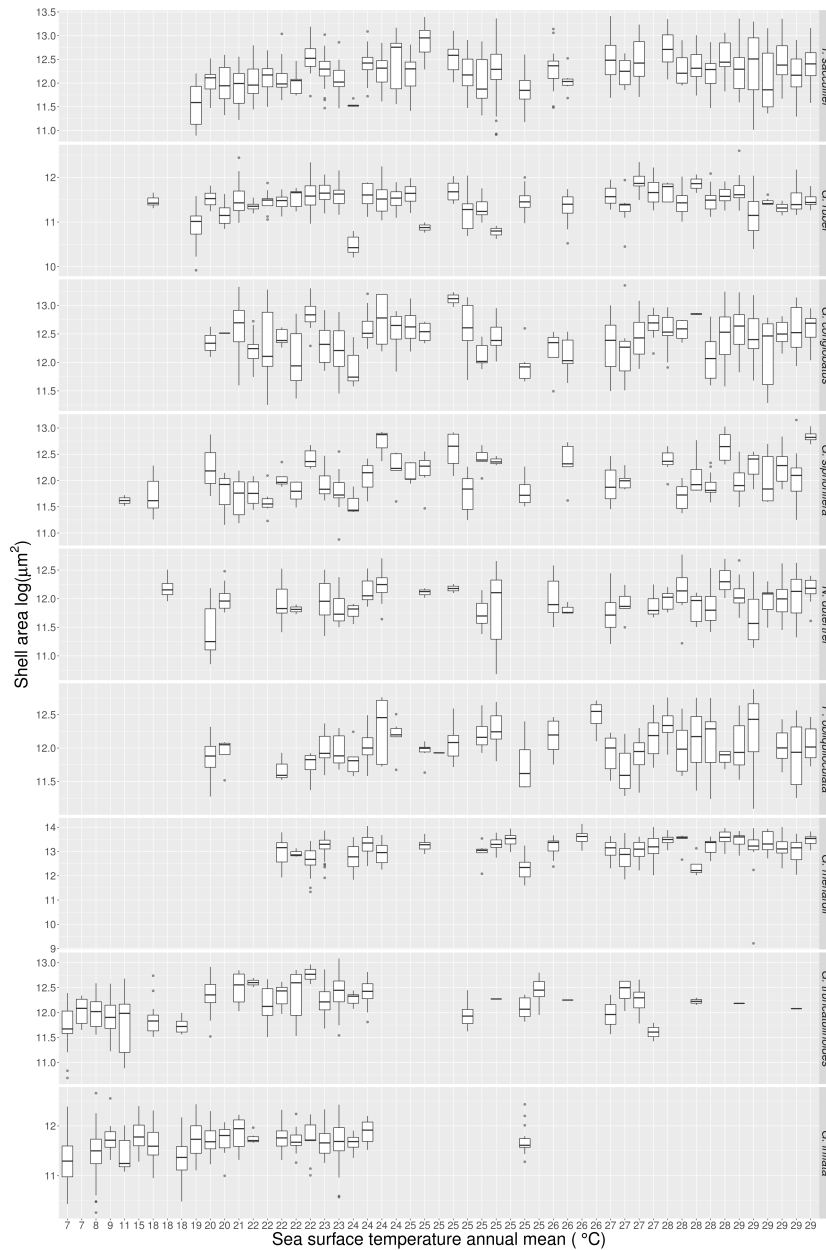

Fig. S3: Shell area within-population variation. Boxplots of individual shell area measurements for each sample for each planktonic foraminifera species. Samples are ordered by sea-surface temperature; note that the x-axis does not increase linearly.

736 **S7 GLM residual plots**

737 Residual plots of the generalised linear model (GLM) with the Gamma logarithmic error  
738 function to correct the quadratic shell area distributions. For each species, the dependent  
739 response variable was the 95th percentile of the population size distribution whereas the  
740 independent explanatory variables were the local relative abundances (median within 300  
741 km distance) and mean annual sea surface temperature.

(a) *Trilobatus sacculifer*

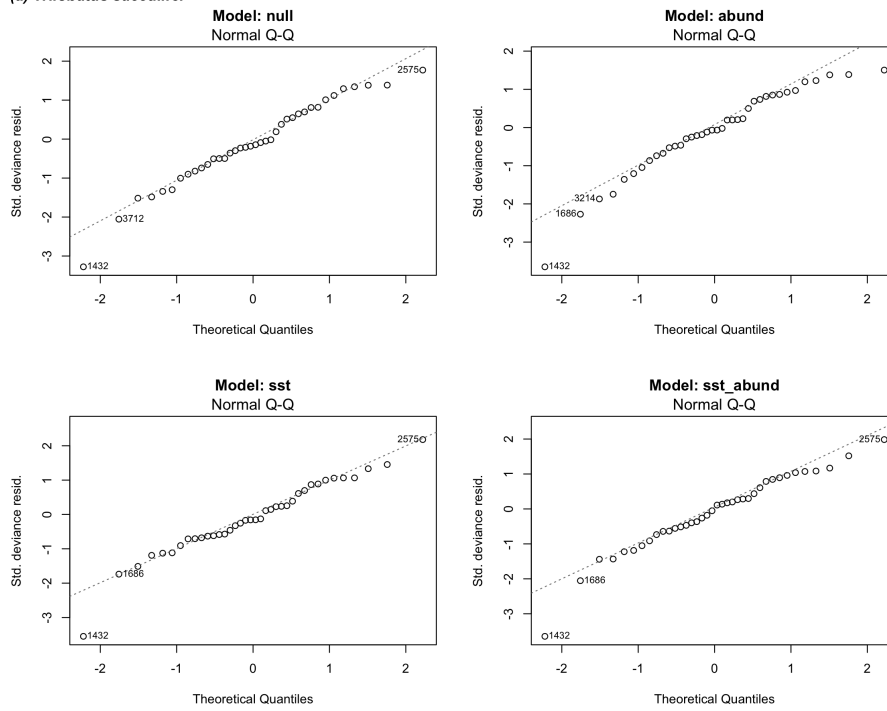

**(b) *Globigerinoides ruber***

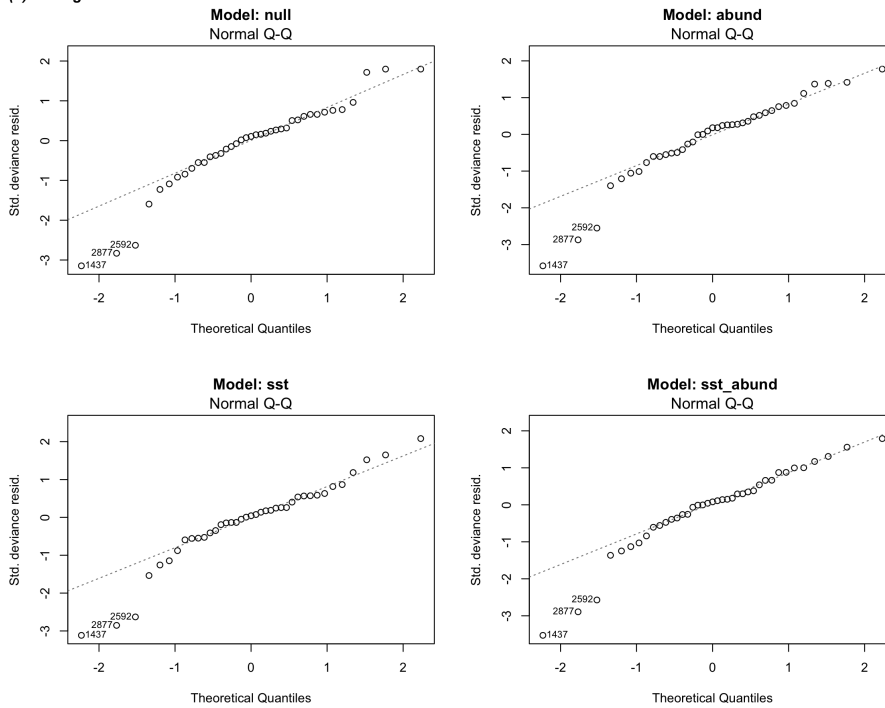

**(c) *Globigerinoides conglobatus***

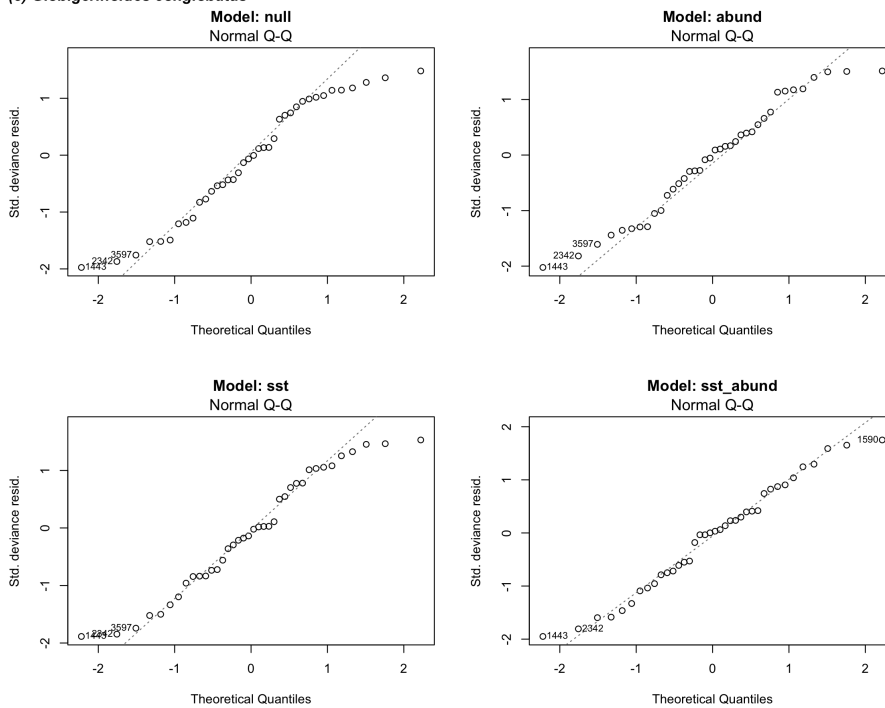

**(d) *Globigerinella siphonifera***

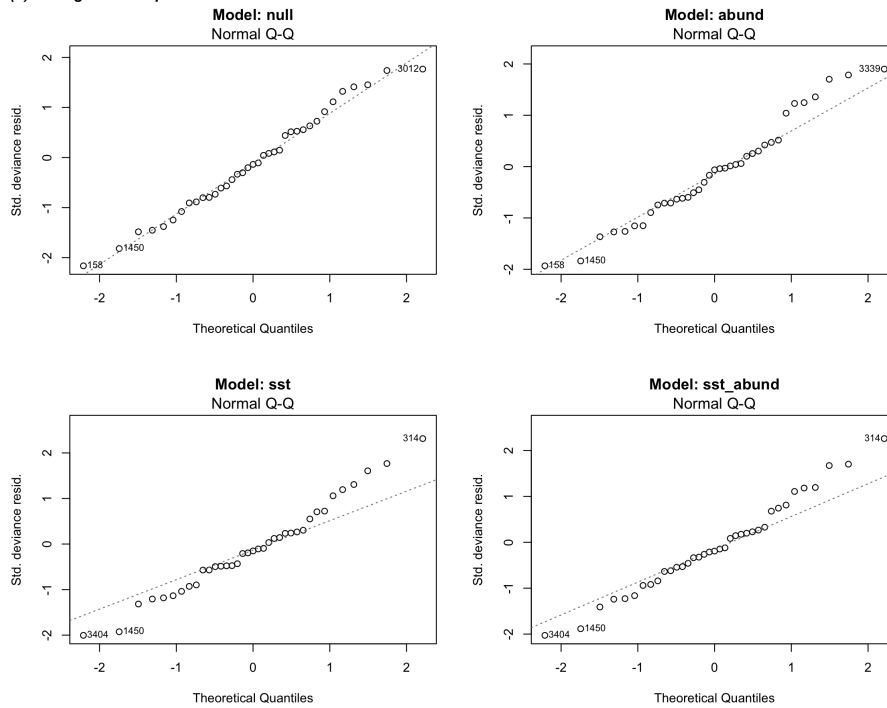

**(e) *Neogloboquadrina dutertrei***

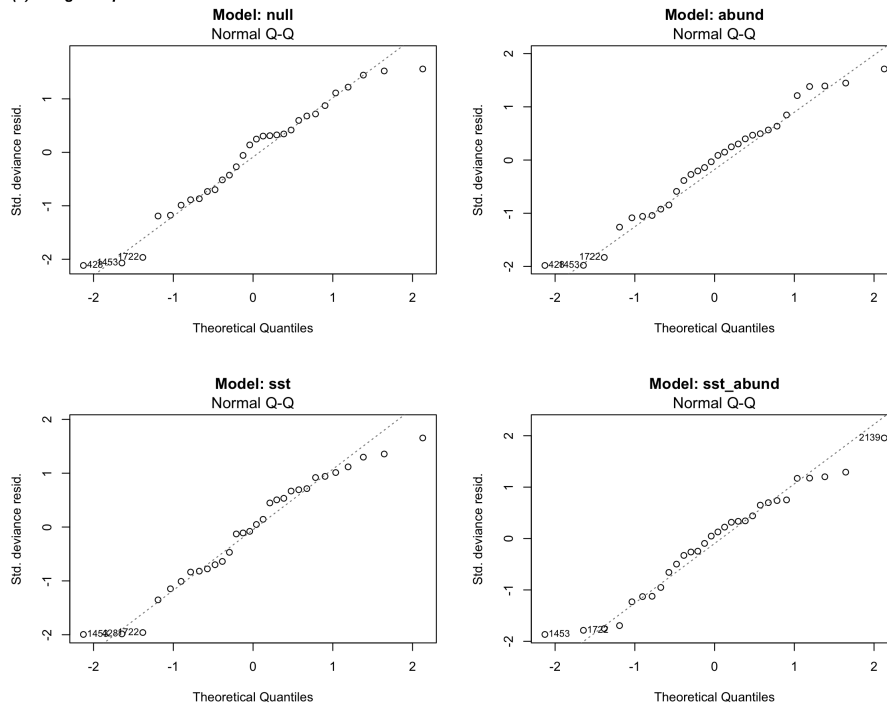

**(f) *Pulleniatina obliquiloculata***

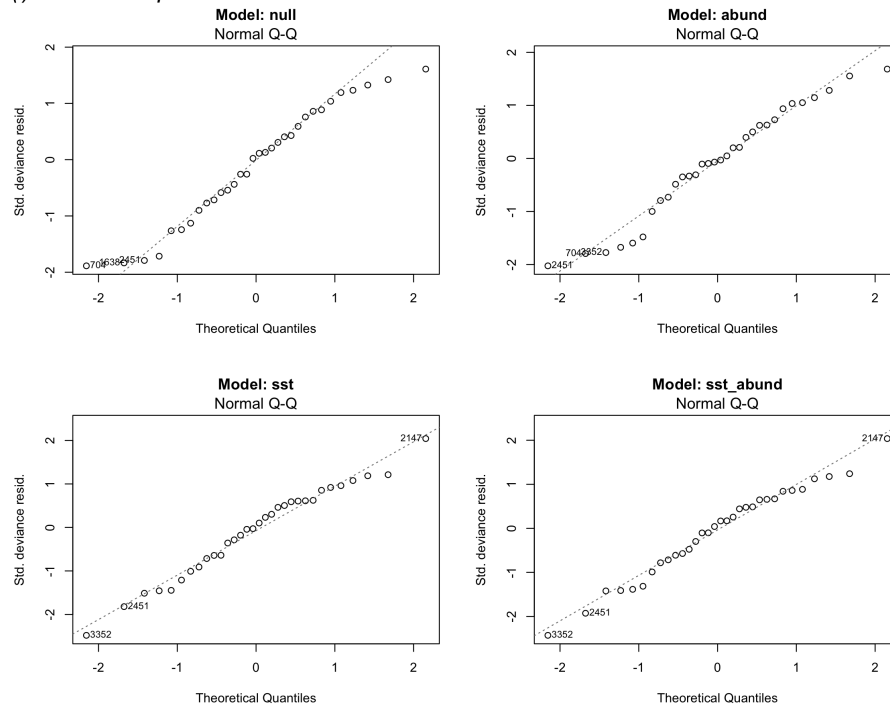

**(g) *Globorotalia menardii***

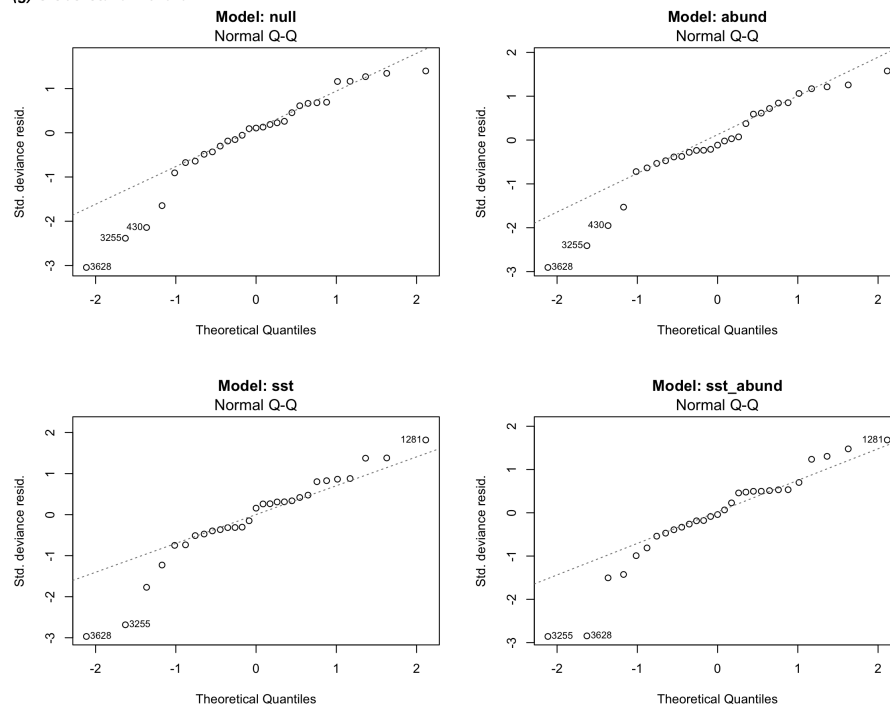

(h) *Globorotalia truncatulinoides*

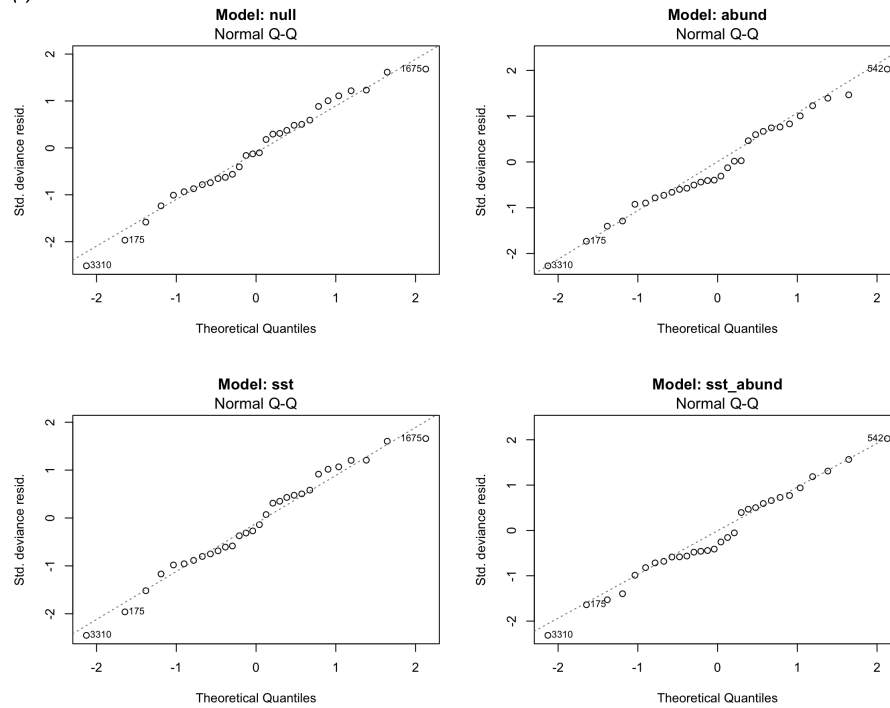

(i) *Globorotalia inflata*

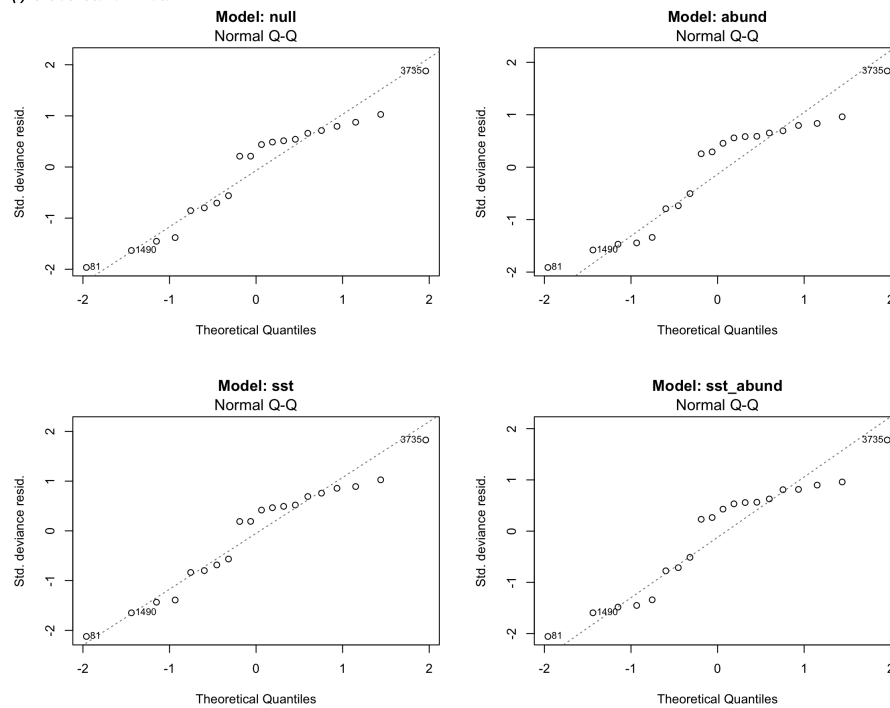

Fig. S4: Generalised linear model residual plots per species. Models: null, abund (relative abundances), sst (mean annual sea surface temperature), and sst\_abund (additive effect of sst and abund).
